# Supplementary material for: Granzyme B PET imaging of immune-mediated tumor killing as a tool for understanding immunotherapy response
Source: PubMed Central journal article supplement — J Immunother Cancer. 2020 May 26;8(1):e000291. doi: 10.1136/jitc-2019-000291 (PMC7254099; doi:10.1136/jitc-2019-000291), 2020-05-26
Supplement: jitc-2019-000291supp002.pdf [file jitc-2019-000291supp002.pdf]

Supplementary Table T1 – CT26 Cell Phenotype FDR Corrections

| Phenotype                    | Tumor   |             |         |             |           |             |
|------------------------------|---------|-------------|---------|-------------|-----------|-------------|
|                              | GZP     |             | Time    |             | Treatment |             |
|                              | P value | FDR q value | P value | FDR q value | P value   | FDR q value |
| GZB+ Effector T-Cells        | 0.444   | 0.631       | 0.796   | 0.934       | 0.145     | 0.488       |
| PD-1+ Effector T-Cells       | 0.162   | 0.472       | 0.053   | 0.474       | 0.172     | 0.516       |
| CD8+/GZB+/PD-1-/EOMES+       | 0.143   | 0.472       | 0.326   | 0.898       | 0.261     | 0.543       |
| Exhausted CD8 T-Cells        | 0.632   | 0.742       | 0.543   | 0.934       | 0.481     | 0.722       |
| Inactive CD8 T-Cells         | 0.017   | 0.230       | 0.170   | 0.766       | 0.400     | 0.675       |
| PD-1+ Naive CD8 T Cells      | 0.663   | 0.746       | 0.721   | 0.934       | 0.600     | 0.771       |
| Memory CD8 T Cells           | 0.312   | 0.525       | 0.479   | 0.934       | 0.753     | 0.833       |
| Exhausted CD8 T-Cells        | 0.428   | 0.631       | 0.757   | 0.934       | 0.125     | 0.488       |
| CD4+/CD25+/FOXP3+            | 0.321   | 0.525       | 0.825   | 0.934       | 0.222     | 0.517       |
| CD4+ T-Cells                 | 0.316   | 0.525       | 0.019   | 0.254       | 0.679     | 0.833       |
| Dysfunctional T-Regs (CD25-) | 0.175   | 0.472       | 0.463   | 0.934       | 0.744     | 0.833       |
| Inactive T-Regs              | 0.804   | 0.835       | 0.934   | 0.934       | 0.471     | 0.722       |
| CD11c+/CD8+                  | 0.503   | 0.647       | 0.776   | 0.934       | 0.020     | 0.177       |
| Immature CD8+ APC            | 0.287   | 0.525       | 0.581   | 0.934       | 0.069     | 0.372       |
| Mature CD8+ APC (86+)        | 0.290   | 0.525       | 0.755   | 0.934       | 0.288     | 0.556       |
| Mature CD8+ APC (80+)        | 0.115   | 0.472       | 0.556   | 0.934       | 0.228     | 0.517       |
| Mature CD8+ APC (80+/86+)    | 0.949   | 0.949       | 0.893   | 0.934       | 0.599     | 0.771       |
| CD11c+ Cells                 | 0.553   | 0.679       | 0.824   | 0.934       | 0.230     | 0.517       |
| CD8- Immature APC            | 0.783   | 0.835       | 0.900   | 0.934       | 0.138     | 0.488       |
| CD8- Mature APC (80+)        | 0.217   | 0.525       | 0.210   | 0.812       | 0.013     | 0.174       |
| CD8- Mature APC (86+)        | 0.151   | 0.472       | 0.398   | 0.934       | 0.542     | 0.770       |
| CD8- Mature APC (80+/86+)    | 0.331   | 0.525       | 0.921   | 0.934       | 0.005     | 0.124       |
| CD8+/CD39+                   | 0.162   | 0.472       | 0.151   | 0.766       | 0.968     | 0.968       |
| 4-1BB+                       | 0.010   | 0.230       | 0.003   | 0.081       | 0.787     | 0.833       |
| CD8+/CTLA-4+                 | 0.036   | 0.323       | 0.152   | 0.766       | 0.058     | 0.372       |
| CD8+/OX-40+                  | 0.094   | 0.472       | 0.293   | 0.898       | 0.376     | 0.675       |
| CD11b+                       | 0.483   | 0.647       | 0.333   | 0.898       | 0.802     | 0.833       |
| Phenotype                    | TDLN    |             |         |             |           |             |
|                              | GZP     |             | Time    |             | Treatment |             |
|                              | P value | FDR q value | P value | FDR q value | P value   | FDR q value |
| GZB+ Effector T-Cells        | 0.701   | 0.788       | 0.901   | 0.901       | 0.312     | 0.779       |
| PD-1+ Effector T-Cells       | 0.311   | 0.382       | 0.736   | 0.818       | 0.278     | 0.779       |
| CD8+/GZB+/PD-1-/EOMES+       | 0.220   | 0.313       | 0.480   | 0.655       | 0.956     | 0.992       |
| Exhausted CD8 T-Cells        | 0.070   | 0.158       | 0.536   | 0.655       | 0.336     | 0.779       |
| Inactive CD8 T-Cells         | 0.026   | 0.077       | 0.052   | 0.472       | 0.378     | 0.779       |
| PD-1+ Naive CD8 T Cells      | 0.124   | 0.209       | 0.375   | 0.655       | 0.262     | 0.779       |
| Memory CD8 T Cells           | 0.150   | 0.225       | 0.459   | 0.655       | 0.067     | 0.779       |
| Exhausted CD8 T-Cells        | 0.104   | 0.200       | 0.271   | 0.570       | 0.331     | 0.779       |
| CD4+/CD25+/FOXP3+            | 0.018   | 0.068       | 0.448   | 0.655       | 0.998     | 0.998       |
| CD4+ T-Cells                 | 0.006   | 0.033       | 0.184   | 0.570       | 0.684     | 0.837       |
| Dysfunctional T-Regs (CD25-) | 0.006   | 0.033       | 0.254   | 0.570       | 0.744     | 0.837       |
| Inactive T-Regs              | 0.382   | 0.449       | 0.854   | 0.887       | 0.426     | 0.779       |
| CD11c+/CD8+                  | 0.039   | 0.107       | 0.225   | 0.570       | 0.721     | 0.837       |
| Immature CD8+ APC            | 0.959   | 0.959       | 0.048   | 0.472       | 0.129     | 0.779       |
| Mature CD8+ APC (86+)        | 0.746   | 0.806       | 0.558   | 0.655       | 0.533     | 0.779       |
| Mature CD8+ APC (80+)        | 0.834   | 0.866       | 0.501   | 0.655       | 0.533     | 0.779       |
| Mature CD8+ APC (80+/86+)    | 0.263   | 0.339       | 0.221   | 0.570       | 0.950     | 0.992       |
| CD11c+ Cells                 | 0.258   | 0.339       | 0.757   | 0.818       | 0.447     | 0.779       |
| CD8- Immature APC            | 0.070   | 0.158       | 0.449   | 0.655       | 0.070     | 0.779       |
| CD8- Mature APC (80+)        | 0.146   | 0.225       | 0.275   | 0.570       | 0.625     | 0.805       |
| CD8- Mature APC (86+)        | 0.023   | 0.077       | 0.390   | 0.655       | 0.626     | 0.805       |
| CD8- Mature APC (80+/86+)    | 0.091   | 0.189       | 0.087   | 0.569       | 0.394     | 0.779       |
| CD8+/CD39+                   | 0.009   | 0.039       | 0.217   | 0.570       | 0.548     | 0.779       |
| 4-1BB+                       | 0.005   | 0.033       | 0.107   | 0.569       | 0.379     | 0.779       |
| CD8+/CTLA-4+                 | 0.006   | 0.033       | 0.126   | 0.569       | 0.405     | 0.779       |
| CD8+/OX-40+                  | 0.006   | 0.033       | 0.052   | 0.472       | 0.486     | 0.779       |
| CD11b+                       | 0.119   | 0.209       | 0.551   | 0.655       | 0.491     | 0.779       |

Supplementary Table T2 – MC38 Cell Phenotype FDR Corrections

| Phenotype                    | Tumor   |       |         |       |           |       |
|------------------------------|---------|-------|---------|-------|-----------|-------|
|                              | GZP     |       | Time    |       | Treatment |       |
|                              | P value | FDR   | P value | FDR   | P value   | FDR   |
| GZB+ Effector T-Cells        | 0.263   | 0.444 | 0.653   | 0.840 | 0.762     | 0.829 |
| PD-1+ Effector T-Cells       | 0.081   | 0.275 | 0.352   | 0.677 | 0.721     | 0.829 |
| CD8+/GZB+/PD-1-/EOMES+       | 0.525   | 0.644 | 0.563   | 0.760 | 0.927     | 0.927 |
| Exhausted CD8 T-Cells        | 0.174   | 0.401 | 0.041   | 0.275 | 0.324     | 0.683 |
| Inactive CD8 T-Cells         | 0.040   | 0.275 | 0.214   | 0.558 | 0.346     | 0.683 |
| PD-1+ Naive CD8 T Cells      | 0.057   | 0.275 | 0.201   | 0.558 | 0.708     | 0.829 |
| Memory CD8 T Cells           | 0.070   | 0.275 | 0.228   | 0.558 | 0.267     | 0.683 |
| Exhausted CD8 T-Cells        | 0.402   | 0.543 | 0.937   | 0.982 | 0.413     | 0.683 |
| CD4+/CD25+/FOXP3+            | 0.131   | 0.393 | 0.173   | 0.558 | 0.084     | 0.456 |
| CD4+ T-Cells                 | 0.989   | 0.989 | 0.451   | 0.677 | 0.516     | 0.697 |
| Dysfunctional T-Regs (CD25-) | 0.074   | 0.275 | 0.864   | 0.972 | 0.038     | 0.256 |
| Inactive T-Regs              | 0.621   | 0.725 | 0.436   | 0.677 | 0.186     | 0.683 |
| CD11c+/CD8+                  | 0.388   | 0.543 | 0.498   | 0.708 | 0.286     | 0.683 |
| Immature CD8+ APC            | 0.311   | 0.494 | 0.390   | 0.677 | 0.649     | 0.829 |
| Mature CD8+ APC (86+)        | 0.071   | 0.275 | 0.982   | 0.982 | 0.022     | 0.256 |
| Mature CD8+ APC (80+)        | 0.753   | 0.813 | 0.341   | 0.677 | 0.809     | 0.840 |
| Mature CD8+ APC (80+/86+)    | 0.208   | 0.401 | 0.754   | 0.926 | 0.000     | 0.001 |
| CD11c+ Cells                 | 0.352   | 0.527 | 0.014   | 0.186 | 0.174     | 0.683 |
| CD8- Immature APC            | 0.644   | 0.725 | 0.011   | 0.186 | 0.375     | 0.683 |
| CD8- Mature APC (80+)        | 0.969   | 0.989 | 0.082   | 0.369 | 0.439     | 0.683 |
| CD8- Mature APC (86+)        | 0.007   | 0.178 | 0.331   | 0.677 | 0.481     | 0.683 |
| CD8- Mature APC (80+/86+)    | 0.020   | 0.274 | 0.193   | 0.558 | 0.387     | 0.683 |
| CD8+/CD39+                   | 0.205   | 0.401 | 0.033   | 0.275 | 0.035     | 0.256 |
| 4-1BB+                       | 0.473   | 0.608 | 0.439   | 0.677 | 0.768     | 0.829 |
| CD8+/CTLA-4+                 | 0.172   | 0.401 | 0.962   | 0.982 | 0.376     | 0.683 |
| CD8+/OX-40+                  | 0.249   | 0.444 | 0.065   | 0.352 | 0.389     | 0.683 |
| CD11b+                       | 0.197   | 0.401 | 0.807   | 0.947 | 0.455     | 0.683 |
| Phenotype                    | TDLN    |       |         |       |           |       |
|                              | GZP     |       | Time    |       | Treatment |       |
|                              | P value | FDR   | P value | FDR   | P value   | FDR   |
| GZB+ Effector T-Cells        | 0.269   | 0.808 | 0.648   | 0.795 | 0.139     | 0.803 |
| PD-1+ Effector T-Cells       | 0.962   | 0.984 | 0.077   | 0.386 | 0.377     | 0.803 |
| CD8+/GZB+/PD-1-/EOMES+       | 0.580   | 0.984 | 0.130   | 0.440 | 0.246     | 0.803 |
| Exhausted CD8 T-Cells        | 0.945   | 0.984 | 0.218   | 0.545 | 0.473     | 0.803 |
| Inactive CD8 T-Cells         | 0.803   | 0.984 | 0.300   | 0.596 | 0.714     | 0.803 |
| PD-1+ Naive CD8 T Cells      | 0.061   | 0.384 | 0.336   | 0.606 | 0.209     | 0.803 |
| Memory CD8 T Cells           | 0.806   | 0.984 | 0.078   | 0.386 | 0.399     | 0.803 |
| Exhausted CD8 T-Cells        | 0.065   | 0.384 | 0.923   | 0.977 | 0.548     | 0.803 |
| CD4+/CD25+/FOXP3+            | 0.071   | 0.384 | 0.231   | 0.545 | 0.916     | 0.916 |
| CD4+ T-Cells                 | 0.600   | 0.984 | 0.369   | 0.623 | 0.710     | 0.803 |
| Dysfunctional T-Regs (CD25-) | 0.727   | 0.984 | 0.100   | 0.386 | 0.459     | 0.803 |
| Inactive T-Regs              | 0.984   | 0.984 | 0.309   | 0.596 | 0.269     | 0.803 |
| CD11c+/CD8+                  | 0.008   | 0.211 | 0.430   | 0.645 | 0.602     | 0.803 |
| Immature CD8+ APC            | 0.100   | 0.446 | 0.546   | 0.775 | 0.593     | 0.803 |
| Mature CD8+ APC (86+)        | 0.919   | 0.984 | 0.422   | 0.645 | 0.034     | 0.803 |
| Mature CD8+ APC (80+)        | 0.176   | 0.593 | 0.921   | 0.977 | 0.086     | 0.803 |
| Mature CD8+ APC (80+/86+)    | 0.492   | 0.984 | 0.796   | 0.934 | 0.599     | 0.803 |
| CD11c+ Cells                 | 0.402   | 0.984 | 0.629   | 0.795 | 0.577     | 0.803 |
| CD8- Immature APC            | 0.116   | 0.446 | 0.950   | 0.977 | 0.423     | 0.803 |
| CD8- Mature APC (80+)        | 0.931   | 0.984 | 0.090   | 0.386 | 0.499     | 0.803 |
| CD8- Mature APC (86+)        | 0.380   | 0.984 | 0.977   | 0.977 | 0.588     | 0.803 |
| CD8- Mature APC (80+/86+)    | 0.923   | 0.984 | 0.617   | 0.795 | 0.655     | 0.803 |
| CD8+/CD39+                   | 0.957   | 0.984 | 0.242   | 0.545 | 0.864     | 0.916 |
| 4-1BB+                       | 0.639   | 0.984 | 0.022   | 0.386 | 0.699     | 0.803 |
| CD8+/CTLA-4+                 | 0.033   | 0.384 | 0.068   | 0.386 | 0.378     | 0.803 |
| CD8+/OX-40+                  | 0.479   | 0.984 | 0.060   | 0.386 | 0.904     | 0.916 |
| CD11b+                       | 0.896   | 0.984 | 0.165   | 0.494 | 0.386     | 0.803 |

Supplementary Table T3 - CT26 Cytokine FDR Corrections

| Phenotype    | Tumor   |       |         |       |           |       |
|--------------|---------|-------|---------|-------|-----------|-------|
|              | GZP     |       | Time    |       | Treatment |       |
|              | P value | FDR   | P value | FDR   | P value   | FDR   |
| G-CSF/CSF-3  | 0.284   | 0.444 | 0.953   | 0.999 | 0.057     | 0.186 |
| IL-10        | 0.670   | 0.804 | 0.940   | 0.999 | 0.201     | 0.342 |
| IL-3         | 0.964   | 0.964 | 0.999   | 0.999 | 0.209     | 0.342 |
| LIF          | 0.088   | 0.187 | 0.635   | 0.999 | 0.264     | 0.404 |
| IL-1b        | 0.000   | 0.004 | 0.172   | 0.999 | 0.876     | 0.900 |
| IL-2         | 0.777   | 0.822 | 0.884   | 0.999 | 0.041     | 0.186 |
| M-CSF        | 0.098   | 0.189 | 0.984   | 0.999 | 0.045     | 0.186 |
| IP-10        | 0.006   | 0.024 | 0.376   | 0.999 | 0.127     | 0.269 |
| IL-4         | 0.100   | 0.189 | 0.961   | 0.999 | 0.049     | 0.186 |
| IL-5         | 0.326   | 0.489 | 0.970   | 0.999 | 0.159     | 0.301 |
| IL-6         | 0.249   | 0.407 | 0.981   | 0.999 | 0.333     | 0.444 |
| IFN-a        | 0.441   | 0.611 | 0.975   | 0.999 | 0.080     | 0.218 |
| IL-22        | 0.086   | 0.187 | 0.245   | 0.999 | 0.326     | 0.444 |
| IL-9         | 0.757   | 0.822 | 0.820   | 0.999 | 0.006     | 0.100 |
| IL-13        | 0.648   | 0.804 | 0.783   | 0.999 | 0.068     | 0.203 |
| IL-27        | 0.003   | 0.017 | 0.912   | 0.999 | 0.147     | 0.294 |
| IL-23        | 0.002   | 0.014 | 0.448   | 0.999 | 0.053     | 0.186 |
| IFN-g        | 0.002   | 0.014 | 0.028   | 0.338 | 0.085     | 0.218 |
| IL-12p70     | 0.060   | 0.144 | 0.992   | 0.999 | 0.047     | 0.186 |
| GM-CSF       | 0.001   | 0.014 | 0.903   | 0.999 | 0.204     | 0.342 |
| Gro-alpha/KC | 0.441   | 0.611 | 0.928   | 0.999 | 0.293     | 0.422 |
| RANTES       | 0.054   | 0.144 | 0.546   | 0.999 | 0.532     | 0.639 |
| TNF-a        | 0.108   | 0.194 | 0.999   | 0.999 | 0.098     | 0.235 |
| MIP-1a       | 0.034   | 0.111 | 0.460   | 0.999 | 0.417     | 0.518 |
| MCP-3        | 0.929   | 0.956 | 0.773   | 0.999 | 0.894     | 0.900 |
| MCP-1        | 0.695   | 0.807 | 0.804   | 0.999 | 0.355     | 0.456 |
| IL-17A       | 0.492   | 0.633 | 0.982   | 0.999 | 0.043     | 0.186 |
| IL-15/IL-15R | 0.057   | 0.144 | 0.986   | 0.999 | 0.029     | 0.186 |
| MIP-2        | 0.045   | 0.134 | 0.823   | 0.999 | 0.002     | 0.079 |
| IL-1a        | 0.015   | 0.053 | 0.920   | 0.999 | 0.034     | 0.186 |
| ENA-78(LIX)  | 0.463   | 0.618 | 0.983   | 0.999 | 0.270     | 0.404 |
| Eotaxin      | 0.000   | 0.004 | 0.377   | 0.999 | 0.730     | 0.847 |
| IL-28        | 0.006   | 0.024 | 0.003   | 0.112 | 0.111     | 0.250 |
| IL-18        | 0.141   | 0.242 | 0.105   | 0.946 | 0.900     | 0.900 |
| MIP-1b       | 0.002   | 0.014 | 0.027   | 0.338 | 0.793     | 0.892 |
| IL-31        | 0.717   | 0.807 | 0.453   | 0.999 | 0.852     | 0.900 |
| Phenotype    | TDLN    |       |         |       |           |       |
|              | GZP     |       | Time    |       | Treatment |       |
|              | P value | FDR   | P value | FDR   | P value   | FDR   |
| G-CSF/CSF-3  | 0.998   | 0.998 | 0.929   | 0.988 | 0.527     | 0.893 |
| IL-10        | 0.343   | 0.998 | 0.812   | 0.988 | 0.617     | 0.893 |
| IL-3         | 0.681   | 0.998 | 0.793   | 0.988 | 0.818     | 0.893 |
| LIF          | 0.769   | 0.998 | 0.598   | 0.988 | 0.700     | 0.893 |
| IL-1b        | 0.841   | 0.998 | 0.152   | 0.988 | 0.568     | 0.893 |
| IL-2         | 0.802   | 0.998 | 0.944   | 0.988 | 0.811     | 0.893 |
| M-CSF        | 0.885   | 0.998 | 0.944   | 0.988 | 0.715     | 0.893 |
| IP-10        | 0.807   | 0.998 | 0.102   | 0.988 | 0.770     | 0.893 |
| IL-4         | 0.227   | 0.998 | 0.891   | 0.988 | 0.110     | 0.893 |
| IL-5         | 0.991   | 0.998 | 0.981   | 0.988 | 0.250     | 0.893 |
| IL-6         | 0.606   | 0.998 | 0.901   | 0.988 | 0.756     | 0.893 |
| IFN-a        | 0.609   | 0.998 | 0.965   | 0.988 | 0.389     | 0.893 |
| IL-22        | 0.604   | 0.998 | 0.238   | 0.988 | 0.910     | 0.916 |
| IL-9         | 0.458   | 0.998 | 0.378   | 0.988 | 0.916     | 0.916 |
| IL-13        | 0.781   | 0.998 | 0.891   | 0.988 | 0.424     | 0.893 |
| IL-27        | 0.216   | 0.998 | 0.242   | 0.988 | 0.188     | 0.893 |
| IL-23        | 0.398   | 0.998 | 0.760   | 0.988 | 0.233     | 0.893 |
| IFN-g        | 0.049   | 0.998 | 0.098   | 0.988 | 0.353     | 0.893 |
| IL-12p70     | 0.638   | 0.998 | 0.955   | 0.988 | 0.592     | 0.893 |
| GM-CSF       | 0.766   | 0.998 | 0.988   | 0.988 | 0.530     | 0.893 |
| Gro-alpha/KC | 0.869   | 0.998 | 0.851   | 0.988 | 0.313     | 0.893 |
| RANTES       | 0.351   | 0.998 | 0.696   | 0.988 | 0.438     | 0.893 |
| TNF-a        | 0.912   | 0.998 | 0.918   | 0.988 | 0.740     | 0.893 |
| MIP-1a       | 0.185   | 0.998 | 0.339   | 0.988 | 0.528     | 0.893 |
| MCP-3        | 0.345   | 0.998 | 0.296   | 0.988 | 0.487     | 0.893 |
| MCP-1        | 0.760   | 0.998 | 0.346   | 0.988 | 0.400     | 0.893 |
| IL-17A       | 0.633   | 0.998 | 0.888   | 0.988 | 0.498     | 0.893 |
| IL-15/IL-15R | 0.939   | 0.998 | 0.924   | 0.988 | 0.559     | 0.893 |
| MIP-2        | 0.644   | 0.998 | 0.752   | 0.988 | 0.108     | 0.893 |
| IL-1a        | 0.186   | 0.998 | 0.817   | 0.988 | 0.466     | 0.893 |
| ENA-78(LIX)  | 0.503   | 0.998 | 0.544   | 0.988 | 0.869     | 0.916 |
| Eotaxin      | 0.963   | 0.998 | 0.455   | 0.988 | 0.805     | 0.893 |
| IL-28        | 0.974   | 0.998 | 0.703   | 0.988 | 0.232     | 0.893 |
| IL-18        | 0.922   | 0.998 | 0.643   | 0.988 | 0.461     | 0.893 |
| MIP-1b       | 0.936   | 0.998 | 0.836   | 0.988 | 0.683     | 0.893 |
| IL-31        | 0.986   | 0.998 | 0.715   | 0.988 | 0.526     | 0.893 |

Supplementary Table T4- MC38 Cytokine FDR Corrections

| Phenotype    | Tumor   |       |         |       |           |       |
|--------------|---------|-------|---------|-------|-----------|-------|
|              | GZP     |       | Time    |       | Treatment |       |
|              | P value | FDR   | P value | FDR   | P value   | FDR   |
| G-CSF/CSF-3  | 0.920   | 0.974 | 0.352   | 0.745 | 0.802     | 0.881 |
| IL-10        | 0.972   | 0.984 | 0.211   | 0.628 | 0.832     | 0.881 |
| IL-3         | 0.022   | 0.078 | 0.402   | 0.775 | 0.446     | 0.697 |
| LIF          | 0.501   | 0.669 | 0.098   | 0.586 | 0.189     | 0.472 |
| IL-1b        | 0.000   | 0.004 | 0.603   | 0.866 | 0.118     | 0.423 |
| IL-2         | 0.252   | 0.432 | 0.129   | 0.586 | 0.023     | 0.203 |
| M-CSF        | 0.331   | 0.497 | 0.429   | 0.775 | 0.644     | 0.809 |
| IP-10        | 0.003   | 0.017 | 0.626   | 0.866 | 0.811     | 0.881 |
| IL-4         | 0.984   | 0.984 | 0.334   | 0.745 | 0.001     | 0.032 |
| IL-5         | 0.000   | 0.009 | 0.895   | 0.982 | 0.044     | 0.227 |
| IL-6         | 0.790   | 0.889 | 0.155   | 0.586 | 0.111     | 0.423 |
| IFN-a        | 0.457   | 0.633 | 0.328   | 0.745 | 0.426     | 0.696 |
| IL-22        | 0.396   | 0.571 | 0.101   | 0.586 | 0.649     | 0.809 |
| IL-9         | 0.266   | 0.436 | 0.105   | 0.586 | 0.680     | 0.816 |
| IL-13        | 0.019   | 0.076 | 0.543   | 0.850 | 0.014     | 0.165 |
| IL-27        | 0.113   | 0.239 | 0.876   | 0.982 | 0.209     | 0.472 |
| IL-23        | 0.113   | 0.239 | 0.004   | 0.148 | 0.652     | 0.809 |
| IFN-g        | 0.184   | 0.331 | 0.175   | 0.586 | 0.040     | 0.227 |
| IL-12p70     | 0.001   | 0.016 | 0.691   | 0.922 | 0.531     | 0.765 |
| GM-CSF       | 0.038   | 0.124 | 0.901   | 0.982 | 0.064     | 0.290 |
| Gro-alpha/KC | 0.627   | 0.752 | 0.168   | 0.586 | 0.274     | 0.493 |
| RANTES       | 0.066   | 0.182 | 0.125   | 0.586 | 0.175     | 0.472 |
| TNF-a        | 0.002   | 0.017 | 0.592   | 0.866 | 0.943     | 0.943 |
| MIP-1a       | 0.046   | 0.139 | 0.961   | 0.985 | 0.233     | 0.473 |
| MCP-3        | 0.008   | 0.035 | 0.843   | 0.982 | 0.250     | 0.473 |
| MCP-1        | 0.575   | 0.740 | 0.179   | 0.586 | 0.203     | 0.472 |
| IL-17A       | 0.086   | 0.216 | 0.106   | 0.586 | 0.559     | 0.773 |
| IL-15/IL-15R | 0.857   | 0.935 | 0.502   | 0.822 | 0.312     | 0.535 |
| MIP-2        | 0.151   | 0.286 | 0.931   | 0.985 | 0.034     | 0.227 |
| IL-1a        | 0.133   | 0.265 | 0.478   | 0.820 | 0.010     | 0.165 |
| ENA-78(LIX)  | 0.746   | 0.866 | 0.333   | 0.745 | 0.239     | 0.473 |
| Eotaxin      | 0.003   | 0.017 | 0.985   | 0.985 | 0.210     | 0.472 |
| IL-28        | 0.294   | 0.460 | 0.430   | 0.775 | 0.804     | 0.881 |
| IL-18        | 0.004   | 0.020 | 0.755   | 0.971 | 0.182     | 0.472 |
| MIP-1b       | 0.090   | 0.216 | 0.861   | 0.982 | 0.898     | 0.923 |
| IL-31        | 0.600   | 0.745 | 0.227   | 0.628 | 0.473     | 0.709 |
| Phenotype    | TDLN    |       |         |       |           |       |
|              | GZP     |       | Time    |       | Treatment |       |
|              | P value | FDR   | P value | FDR   | P value   | FDR   |
| G-CSF/CSF-3  | 0.368   | 0.737 | 0.799   | 0.945 | 0.342     | 0.864 |
| IL-10        | 0.044   | 0.160 | 0.619   | 0.945 | 0.908     | 0.949 |
| IL-3         | 0.565   | 0.786 | 0.343   | 0.815 | 0.874     | 0.949 |
| LIF          | 0.568   | 0.786 | 0.302   | 0.815 | 0.206     | 0.864 |
| IL-1b        | 0.739   | 0.872 | 0.292   | 0.815 | 0.776     | 0.931 |
| IL-2         | 0.548   | 0.786 | 0.362   | 0.815 | 0.757     | 0.931 |
| M-CSF        | 0.921   | 0.921 | 0.098   | 0.815 | 0.281     | 0.864 |
| IP-10        | 0.751   | 0.872 | 0.132   | 0.815 | 0.081     | 0.864 |
| IL-4         | 0.063   | 0.190 | 0.089   | 0.815 | 0.093     | 0.864 |
| IL-5         | 0.394   | 0.746 | 0.141   | 0.815 | 0.730     | 0.931 |
| IL-6         | 0.000   | 0.005 | 0.910   | 0.945 | 0.330     | 0.864 |
| IFN-a        | 0.740   | 0.872 | 0.336   | 0.815 | 0.999     | 0.999 |
| IL-22        | 0.455   | 0.779 | 0.591   | 0.945 | 0.638     | 0.931 |
| IL-9         | 0.002   | 0.017 | 0.783   | 0.945 | 0.722     | 0.931 |
| IL-13        | 0.880   | 0.921 | 0.212   | 0.815 | 0.648     | 0.931 |
| IL-27        | 0.000   | 0.005 | 0.555   | 0.945 | 0.360     | 0.864 |
| IL-23        | 0.012   | 0.047 | 0.193   | 0.815 | 0.586     | 0.931 |
| IFN-g        | 0.887   | 0.921 | 0.597   | 0.945 | 0.235     | 0.864 |
| IL-12p70     | 0.056   | 0.183 | 0.685   | 0.945 | 0.296     | 0.864 |
| GM-CSF       | 0.669   | 0.872 | 0.222   | 0.815 | 0.398     | 0.895 |
| Gro-alpha/KC | 0.689   | 0.872 | 0.323   | 0.815 | 0.359     | 0.864 |
| RANTES       | 0.227   | 0.545 | 0.825   | 0.945 | 0.091     | 0.864 |
| TNF-a        | 0.000   | 0.005 | 0.919   | 0.945 | 0.504     | 0.931 |
| MIP-1a       | 0.914   | 0.921 | 0.213   | 0.815 | 0.750     | 0.931 |
| MCP-3        | 0.335   | 0.709 | 0.449   | 0.897 | 0.922     | 0.949 |
| MCP-1        | 0.511   | 0.786 | 0.034   | 0.815 | 0.191     | 0.864 |
| IL-17A       | 0.518   | 0.786 | 0.634   | 0.945 | 0.670     | 0.931 |
| IL-15/IL-15R | 0.128   | 0.329 | 0.711   | 0.945 | 0.325     | 0.864 |
| MIP-2        | 0.801   | 0.901 | 0.523   | 0.945 | 0.575     | 0.931 |
| IL-1a        | 0.000   | 0.005 | 0.908   | 0.945 | 0.824     | 0.936 |
| ENA-78(LIX)  | 0.006   | 0.036 | 0.875   | 0.945 | 0.832     | 0.936 |
| Eotaxin      | 0.292   | 0.657 | 0.264   | 0.815 | 0.438     | 0.906 |
| IL-28        | 0.008   | 0.041 | 0.991   | 0.991 | 0.453     | 0.906 |
| IL-18        | 0.117   | 0.323 | 0.657   | 0.945 | 0.723     | 0.931 |
| MIP-1b       | 0.011   | 0.047 | 0.844   | 0.945 | 0.182     | 0.864 |
| IL-31        | 0.422   | 0.760 | 0.425   | 0.897 | 0.180     | 0.864 |

Supplementary Table T5 – Effector CD8 T Cells

| Condition    | TBR  | CD8  | PD1  | GZB  | PD1+<br>GZB+ | PD1-<br>GZB+ | EOMES+<br>GZB+ | EOMES-<br>GZB+ | PD1+<br>EOMES+<br>GZB+ |
|--------------|------|------|------|------|--------------|--------------|----------------|----------------|------------------------|
| CT26 D6 Veh  | 0.51 | 12.4 | 5.5  | 6.98 | 0.42         | 6.55         | 6.55           | 0.42           | 0.42                   |
| CT26 D6 Veh  | 0.52 | 8.57 | 72   | 86.1 | 55.2         | 31           | 70.5           | 15.6           | 41.4                   |
| CT26 D6 Veh  | 0.57 | 7.74 | 73.7 | 81.7 | 59           | 22.7         | 57.2           | 24.5           | 31.7                   |
| CT26 D6 Veh  | 1.33 | 3.62 | 55   | 50   | 37.5         | 12.5         | 30             | 20             | 17.5                   |
| CT26 D6 Tx   | 0.60 | 4.47 | 24.1 | 36.1 | 10.8         | 25.3         | 32.5           | 3.61           | 10.8                   |
| CT26 D6 Tx   | 1.32 | 2.69 | 44.2 | 42.9 | 18.2         | 24.7         | 33.8           | 9.09           | 11.7                   |
| CT26 D6 Tx   | 1.85 | 8.93 | 10.2 | 2.63 | 0.88         | 1.75         | 1.17           | 1.46           | 0.58                   |
| CT26 D6 Tx   | 2.15 | 5.07 | 37   | 39.9 | 16.7         | 23.2         | 30.4           | 9.42           | 11.6                   |
| CT26 D9 Veh  | 1.34 | 8.8  | 27.3 | 80.4 | 19.5         | 60.9         | 62.6           | 17.8           | 11.6                   |
| CT26 D9 Veh  | 2.45 | 7.74 | 54.2 | 67.9 | 40.6         | 27.2         | 52.2           | 15.6           | 29                     |
| CT26 D9 Veh  | 1.48 | 4.99 | 24.4 | 64.7 | 14.2         | 50.5         | 51.9           | 12.9           | 10.2                   |
| CT26 D9 Veh  | 1.24 | 5.28 | 18.8 | 43.2 | 6.31         | 36.9         | 30.5           | 12.6           | 2.56                   |
| CT26 D9 Tx   | 2.16 | 4.73 | 60.8 | 96.9 | 54.6         | 42.3         | 75.6           | 21.3           | 43.7                   |
| CT26 D9 Tx   | 1.07 | 5.08 | 16.7 | 53.3 | 11.1         | 42.2         | 43.3           | 10             | 8.89                   |
| CT26 D9 Tx   | 2.58 | 3.54 | 15.7 | 86.5 | 12.4         | 74.2         | 65.5           | 21             | 8.24                   |
| CT26 D9 Tx   | 1.81 | 3.03 | 18.1 | 85.5 | 16.1         | 69.4         | 63.7           | 21.8           | 12.4                   |
| CT26 D12 Veh | 0.94 | 12.3 | 27.1 | 41.9 | 9.83         | 32.1         | 39.8           | 2.17           | 8.69                   |
| CT26 D12 Veh | 1.16 | 9.46 | 39.5 | 37.2 | 9.22         | 28           | 31.9           | 5.31           | 5.31                   |
| CT26 D12 Veh | 2.03 | 9.5  | 47.9 | 75.4 | 33.2         | 42.2         | 53             | 22.5           | 19.2                   |
| CT26 D12 Veh | 2.37 | 7.96 | 60.9 | 62.6 | 41.4         | 21.2         | 51.7           | 10.9           | 34.5                   |
| CT26 D12 Veh | 0.94 | 12.3 | 27.1 | 41.9 | 9.83         | 32.1         | 39.8           | 2.17           | 8.69                   |
| CT26 D12 Veh | 1.16 | 9.46 | 39.5 | 37.2 | 9.22         | 28           | 31.9           | 5.31           | 5.31                   |
| CT26 D12 Veh | 2.03 | 9.5  | 47.9 | 75.4 | 33.2         | 42.2         | 53             | 22.5           | 19.2                   |
| CT26 D12 Veh | 2.37 | 7.96 | 60.9 | 62.6 | 41.4         | 21.2         | 51.7           | 10.9           | 34.5                   |
| CT26 D12 Tx  | 2.06 | 17.8 | 31.8 | 53.3 | 12           | 41.3         | 45.9           | 7.44           | 8.26                   |
| CT26 D12 Tx  | 2.67 | 17.7 | 55.2 | 79.3 | 37.1         | 42.1         | 57.7           | 21.5           | 23.2                   |
| CT26 D12 Tx  | 2.94 | 10.4 | 23.6 | 83.9 | 14.2         | 69.7         | 76.4           | 7.49           | 10.5                   |
| CT26 D12 Tx  | 3.64 | 10.7 | 30.8 | 68.8 | 18.2         | 50.6         | 48.7           | 20             | 11.2                   |
| MC38 D6 Veh  | 0.77 | 9.31 | 33.5 | 35.4 | 13.4         | 22.1         | 29.2           | 6.27           | 10.1                   |
| MC38 D6 Veh  | 0.82 | 20.9 | 3.98 | 3.98 | 0.57         | 3.41         | 3.98           | 0              | 0.57                   |
| MC38 D6 Veh  | 0.93 | 21.9 | 42.9 | 42.9 | 35.7         | 7.14         | 14.3           | 28.6           | 7.14                   |
| MC38 D6 Veh  | 1.22 | 3.53 | 45.8 | 39.7 | 21.2         | 18.4         | 33.5           | 6.15           | 16.2                   |
| MC38 D6 Tx   | 0.66 | 3.5  | 31.4 | 54.6 | 20.2         | 34.4         | 46.3           | 8.33           | 15.2                   |
| MC38 D6 Tx   | 1.08 | 12.2 | 26   | 30   | 11.3         | 18.8         | 25.3           | 4.69           | 8.58                   |
| MC38 D6 Tx   | 1.54 | 4.17 | 51.3 | 34.2 | 22.5         | 11.7         | 29             | 5.19           | 17.5                   |
| MC38 D6 Tx   | 1.77 | 4.84 | 21.8 | 29.5 | 10.6         | 18.9         | 26.1           | 3.42           | 8.45                   |
| MC38 D9 Veh  | 0.96 | 7.93 | 52   | 70.7 | 39.2         | 31.4         | 62.1           | 8.58           | 34.7                   |
| MC38 D9 Veh  | 2.09 | 5.41 | 43.3 | 47.8 | 25.9         | 21.9         | 39.5           | 8.27           | 20                     |
| MC38 D9 Veh  | 2.23 | 7.47 | 70.7 | 72.9 | 56.2         | 16.7         | 66             | 6.86           | 50.6                   |

|              |      |      |      |      |      |      |      |      |      |
|--------------|------|------|------|------|------|------|------|------|------|
| MC38 D9 Veh  | 2.57 | 5.28 | 34.2 | 62.1 | 24.1 | 37.9 | 53   | 9.03 | 19.4 |
| MC38 D9 Tx   | 2.30 | 4.39 | 55.9 | 64.7 | 42.1 | 22.6 | 57.3 | 7.4  | 38   |
| MC38 D9 Tx   | 2.63 | 22.3 | 87.2 | 87.6 | 78.4 | 9.21 | 78   | 9.62 | 67.5 |
| MC38 D9 Tx   | 3.04 | 9.48 | 44.1 | 81.1 | 34.2 | 47   | 70.3 | 10.8 | 28.8 |
| MC38 D9 Tx   | 3.08 | 9.55 | 52.1 | 84.2 | 37.8 | 46.4 | 72.5 | 11.7 | 31.8 |
| MC38 D12 Veh | 2.24 | 8.45 | 84.9 | 88.3 | 77.3 | 11   | 81.1 | 7.22 | 66.7 |
| MC38 D12 Veh | 1.70 | 6.06 | 73   | 74.7 | 58   | 16.7 | 70.1 | 4.59 | 53.2 |
| MC38 D12 Veh | 2.36 | 11.2 | 71.3 | 78.1 | 62.5 | 15.7 | 74.6 | 3.51 | 58.1 |
| MC38 D12 Veh | 2.46 | 5.95 | 44.5 | 61.8 | 37.8 | 24   | 58   | 3.82 | 34.4 |
| MC38 D12 Tx  | 1.84 | 30.4 | 87.1 | 88.2 | 79.4 | 8.83 | 82.3 | 5.92 | 72.4 |
| MC38 D12 Tx  | 1.65 | 47.8 | 88.9 | 77.3 | 69.8 | 7.5  | 71.9 | 5.46 | 63.6 |
| MC38 D12 Tx  | 2.63 | 39   | 87.8 | 85.4 | 75.7 | 9.68 | 77.9 | 7.53 | 67.5 |

**Supplementary Table T6 – CD4 T Cells**

| Condition    | TBR  | CD4  | CD25+FOXP3+ | CD25-FOXP3- |
|--------------|------|------|-------------|-------------|
| CT26 D6 Veh  | 0.51 | 36.6 | 7.11        | 55.3        |
| CT26 D6 Veh  | 0.52 | 40.5 | 22.3        | 3.62        |
| CT26 D6 Veh  | 0.57 | 26.6 | 20.9        | 9.37        |
| CT26 D6 Veh  | 1.33 | 21   | 16.6        | 8.59        |
| CT26 D6 Tx   | 0.60 | 16.1 | 13.4        | 37.4        |
| CT26 D6 Tx   | 1.32 | 13.2 | 16.8        | 23.8        |
| CT26 D6 Tx   | 1.85 | 26.7 | 4.21        | 77.7        |
| CT26 D6 Tx   | 2.15 | 18.9 | 18.4        | 27.5        |
| CT26 D9 Veh  | 1.34 | 20.8 | 8.49        | 34.4        |
| CT26 D9 Veh  | 2.45 | 13.8 | 6.17        | 35.5        |
| CT26 D9 Veh  | 1.48 | 16.6 | 3.36        | 34.5        |
| CT26 D9 Veh  | 1.24 | 17.2 | 3.98        | 40.6        |
| CT26 D9 Tx   | 2.16 | 12.4 | 7.79        | 39.4        |
| CT26 D9 Tx   | 1.07 | 17   | 6.4         | 46.8        |
| CT26 D9 Tx   | 2.58 | 14.1 | 4.25        | 35.4        |
| CT26 D9 Tx   | 1.81 | 15.8 | 6.13        | 36.1        |
| CT26 D12 Veh | 0.94 | 64.9 | 86.3        | 3.72        |
| CT26 D12 Veh | 1.16 | 36.5 | 20.6        | 5.02        |
| CT26 D12 Veh | 2.03 | 20.8 | 17.2        | 7.56        |
| CT26 D12 Veh | 2.37 | 17.8 | 30          | 12.9        |
| CT26 D12 Tx  | 2.06 | 30.7 | 14.4        | 16          |
| CT26 D12 Tx  | 2.67 | 33.7 | 7.11        | 3.64        |
| CT26 D12 Tx  | 2.94 | 25.5 | 21.1        | 4.94        |
| CT26 D12 Tx  | 3.64 | 25.2 | 21.2        | 13.4        |
| MC38 D6 Veh  | 0.77 | 13.9 | 17.5        | 25.4        |
| MC38 D6 Veh  | 0.82 | 31   | 11.6        | 42.2        |
| MC38 D6 Veh  | 0.93 | 32.5 | 10.3        | 38.5        |
| MC38 D6 Veh  | 1.22 | 5.3  | 5.81        | 28.6        |

|              |      |      |      |      |
|--------------|------|------|------|------|
| MC38 D6 Tx   | 0.66 | 7.43 | 13.9 | 23.2 |
| MC38 D6 Tx   | 1.08 | 13.2 | 11.7 | 39.8 |
| MC38 D6 Tx   | 1.54 | 7.85 | 15.3 | 28   |
| MC38 D6 Tx   | 1.77 | 8.53 | 17.3 | 31   |
| MC38 D9 Veh  | 0.96 | 7.88 | 40.4 | 6.03 |
| MC38 D9 Veh  | 2.09 | 8.76 | 41.7 | 13.4 |
| MC38 D9 Veh  | 2.23 | 5.48 | 35.5 | 13.3 |
| MC38 D9 Veh  | 2.57 | 6.87 | 31.4 | 18.6 |
| MC38 D9 Tx   | 2.30 | 11.4 | 11.1 | 10.6 |
| MC38 D9 Tx   | 2.63 | 13.5 | 6    | 7.46 |
| MC38 D9 Tx   | 3.04 | 2.99 | 12.4 | 14.7 |
| MC38 D9 Tx   | 3.08 | 8.59 | 10.3 | 9.25 |
| MC38 D12 Veh | 2.24 | 5.94 | 10.7 | 34.1 |
| MC38 D12 Veh | 1.70 | 4.32 | 9.24 | 45.5 |
| MC38 D12 Veh | 2.36 | 6.5  | 11.8 | 34.9 |
| MC38 D12 Veh | 2.46 | 7.89 | 6.08 | 52.6 |
| MC38 D12 Tx  | 1.84 | 18.9 | 12.2 | 30.7 |
| MC38 D12 Tx  | 1.65 | 24.6 | 9.9  | 40.3 |
| MC38 D12 Tx  | 2.63 | 41.2 | 2.95 | 46.4 |

**Supplementary Table T7 – CD8 T Cell Checkpoint Proteins**

| <b>Condition</b> | <b>TBR</b> | <b>CD39</b> | <b>CD137</b> | <b>CTLA4</b> | <b>OX40</b> |
|------------------|------------|-------------|--------------|--------------|-------------|
| CT26 D6 Veh      | 0.51       | 36.5        | 3.88         | 2.1          | 3.88        |
| CT26 D6 Veh      | 0.52       | 95.9        | 6.77         | 5.52         | 57.4        |
| CT26 D6 Veh      | 0.57       | 94          | 8.61         | 3.37         | 41.9        |
| CT26 D6 Veh      | 1.33       | 91.4        | 5.38         | 9.68         | 33.3        |
| CT26 D6 Tx       | 0.60       | 78.4        | 9.56         | 2.67         | 19.9        |
| CT26 D6 Tx       | 1.32       | 66.7        | 7.73         | 6.01         | 16.9        |
| CT26 D6 Tx       | 1.85       | 31.2        | 4.11         | 6.17         | 8.73        |
| CT26 D6 Tx       | 2.15       | 74.2        | 9.8          | 5.19         | 32.5        |
| CT26 D9 Veh      | 1.34       | 78.3        | 24.4         | 9.25         | 50          |
| CT26 D9 Veh      | 2.45       | 77.3        | 25.6         | 9.26         | 45.1        |
| CT26 D9 Veh      | 1.48       | 78.2        | 16.7         | 4.96         | 49.2        |
| CT26 D9 Veh      | 1.24       | 71.8        | 15.7         | 10.4         | 43.3        |
| CT26 D9 Tx       | 2.16       | 95.8        | 31.1         | 31.5         | 45.4        |
| CT26 D9 Tx       | 1.07       | 75.9        | 28.6         | 8.73         | 49.5        |
| CT26 D9 Tx       | 2.58       | 88.6        | 32.2         | 9.41         | 63.9        |
| CT26 D9 Tx       | 1.81       | 84.9        | 42.7         | 15.1         | 54.3        |
| CT26 D12 Veh     | 0.94       | 87.8        | 96.6         | 8            | 39.4        |
| CT26 D12 Veh     | 1.16       | 92          | 76.1         | 8.27         | 19.3        |
| CT26 D12 Veh     | 2.03       | 93.1        | 50.3         | 21.9         | 25.7        |
| CT26 D12 Veh     | 2.37       | 86.9        | 40           | 22.1         | 26.7        |
| CT26 D12 Tx      | 2.06       | 97.9        | 50.9         | 46           | 54.7        |
| CT26 D12 Tx      | 2.67       | 97          | 63.7         | 30.4         | 47.3        |

|              |      |      |      |      |      |
|--------------|------|------|------|------|------|
| CT26 D12 Tx  | 2.94 | 96.6 | 64.3 | 65.8 | 78.7 |
| CT26 D12 Tx  | 3.64 | 92.5 | 60.8 | 32   | 42.6 |
| MC38 D6 Veh  | 0.77 | 51.1 | 17   | 9.43 | 17.3 |
| MC38 D6 Veh  | 0.82 | 19   | 2.14 | 2.29 | 4.59 |
| MC38 D6 Veh  | 0.93 | 45.5 | 6.06 | 9.09 | 27.3 |
| MC38 D6 Veh  | 1.22 | 54.4 | 6.46 | 6.46 | 15.2 |
| MC38 D6 Tx   | 0.66 | 48.4 | 20.3 | 4.55 | 13.1 |
| MC38 D6 Tx   | 1.08 | 65.3 | 15.4 | 15.6 | 18.7 |
| MC38 D6 Tx   | 1.54 | 61.9 | 16.8 | 7.17 | 21.5 |
| MC38 D6 Tx   | 1.77 | 42.4 | 13.3 | 3.52 | 13.6 |
| MC38 D9 Veh  | 0.96 | 65.4 | 27   | 15.4 | 29.1 |
| MC38 D9 Veh  | 2.09 | 55.3 | 17.4 | 10.1 | 18.9 |
| MC38 D9 Veh  | 2.23 | 64.4 | 11.9 | 6.17 | 13.3 |
| MC38 D9 Veh  | 2.57 | 59.7 | 16.7 | 13.4 | 20.3 |
| MC38 D9 Tx   | 2.30 | 69.5 | 12.8 | 11.7 | 19.4 |
| MC38 D9 Tx   | 2.63 | 80   | 5.15 | 8.95 | 16   |
| MC38 D9 Tx   | 3.04 | 67.3 | 18.8 | 13.2 | 36.2 |
| MC38 D9 Tx   | 3.08 | 73.6 | 12.4 | 21.1 | 37.8 |
| MC38 D12 Veh | 2.24 | 83.3 | 51   | 7.29 | 43.2 |
| MC38 D12 Veh | 1.70 | 72   | 28.3 | 4.81 | 25   |
| MC38 D12 Veh | 2.36 | 70.7 | 45.6 | 2.81 | 39.2 |
| MC38 D12 Veh | 2.46 | 41.9 | 28   | 3.87 | 25.9 |
| MC38 D12 Tx  | 1.84 | 86.3 | 46   | 11.3 | 55.7 |
| MC38 D12 Tx  | 1.65 | 91.2 | 38.7 | 4.96 | 37.2 |
| MC38 D12 Tx  | 2.63 | 85.7 | 23.2 | 5.58 | 34.8 |

**Supplementary Table T8 - CD11b+ Immune Cells**

| <b>Condition</b> | <b>TBR</b> | <b>CD11b</b> | <b>Neutrophils</b> | <b>MDSC</b> | <b>M1</b> | <b>M2</b> |
|------------------|------------|--------------|--------------------|-------------|-----------|-----------|
| CT26 D6 Veh      | 0.51       | 48.8         | 9.4                | 42.1        | 22.6      | 0.042     |
| CT26 D6 Veh      | 0.52       | 83.7         | 5.62               | 38          | 39.7      | 0.00763   |
| CT26 D6 Veh      | 0.57       | 83.1         | 6.27               | 31.7        | 39.4      | 0         |
| CT26 D6 Veh      | 1.33       | 85.4         | 6.96               | 35.2        | 43.7      | 0         |
| CT26 D6 Tx       | 0.60       | 73.5         | 8.23               | 32.1        | 56.9      | 0         |
| CT26 D6 Tx       | 1.32       | 85.6         | 3.44               | 34.7        | 55.1      | 0         |
| CT26 D6 Tx       | 1.85       | 34.4         | 5.08               | 28.7        | 29.8      | 0.048     |
| CT26 D6 Tx       | 2.15       | 73           | 8.16               | 32.1        | 55.9      | 0         |
| CT26 D9 Veh      | 1.34       | 76.1         | 2.72               | 24.6        | 18.5      | 0.04      |
| CT26 D9 Veh      | 2.45       | 79.7         | 4.38               | 38.2        | 32.1      | 0.019     |
| CT26 D9 Veh      | 1.48       | 79.7         | 1.42               | 15          | 24.4      | 0.041     |
| CT26 D9 Veh      | 1.24       | 82.3         | 1.81               | 20.9        | 35        | 0.029     |
| CT26 D9 Tx       | 2.16       | 85.8         | 1.33               | 66          | 12.8      | 0.017     |
| CT26 D9 Tx       | 1.07       | 80.7         | 2.6                | 48.7        | 18.2      | 0.015     |
| CT26 D9 Tx       | 2.58       | 84.3         | 1.5                | 39.4        | 23.1      | 0         |
| CT26 D9 Tx       | 1.81       | 88.4         | 1.16               | 71.6        | 14.3      | 0         |



|              |      |      |      |      |      |         |
|--------------|------|------|------|------|------|---------|
| CT26 D12 Veh | 0.94 | 81.7 | 0.59 | 68.8 | 7.97 | 0.72    |
| CT26 D12 Veh | 1.16 | 91.6 | 0.91 | 62.8 | 13   | 0.017   |
| CT26 D12 Veh | 2.03 | 83.9 | 3.36 | 43   | 21.2 | 0.00925 |
| CT26 D12 Veh | 2.37 | 85.1 | 2.47 | 42.4 | 32   | 0.00854 |
| CT26 D12 Tx  | 2.06 | 79.3 | 4.89 | 44.2 | 27.2 | 0       |
| CT26 D12 Tx  | 2.67 | 90.7 | 0.83 | 66.6 | 15.7 | 0       |
| CT26 D12 Tx  | 2.94 | 86.8 | 0.77 | 26.2 | 28.2 | 0       |
| CT26 D12 Tx  | 3.64 | 82.5 | 2.94 | 52   | 34.4 | 0.024   |
| MC38 D6 Veh  | 0.77 | 74.2 | 7.5  | 30.2 | 44.4 | 0       |
| MC38 D6 Veh  | 0.82 | 26.3 | 19   | 38.8 | 38.3 | 0.11    |
| MC38 D6 Veh  | 0.93 | 16.4 | 30.4 | 19.3 | 33.5 | 0       |
| MC38 D6 Veh  | 1.22 | 74.3 | 13.4 | 38.6 | 61.5 | 0       |
| MC38 D6 Tx   | 0.66 | 87   | 4.41 | 52.9 | 69.6 | 0.011   |
| MC38 D6 Tx   | 1.08 | 66.2 | 2.7  | 43.2 | 51.8 | 0.043   |
| MC38 D6 Tx   | 1.54 | 82.2 | 8.36 | 42.2 | 59.4 | 0.012   |
| MC38 D6 Tx   | 1.77 | 83.2 | 6.09 | 43.8 | 59.4 | 0.00973 |
| MC38 D9 Veh  | 0.96 | 93.3 | 0.24 | 27.5 | 48.5 | 0.021   |
| MC38 D9 Veh  | 2.09 | 85.8 | 4.02 | 23.4 | 43.3 | 0.00452 |
| MC38 D9 Veh  | 2.23 | 92.4 | 0.53 | 30.1 | 57.5 | 0.029   |
| MC38 D9 Veh  | 2.57 | 92.2 | 0.59 | 30.4 | 59.4 | 0.022   |
| MC38 D9 Tx   | 2.30 | 93.5 | 0.84 | 33.1 | 54.4 | 0       |
| MC38 D9 Tx   | 2.63 | 83.9 | 2.79 | 31   | 45   | 0.011   |
| MC38 D9 Tx   | 3.04 | 92.4 | 0.73 | 41.8 | 35.6 | 0.00798 |
| MC38 D9 Tx   | 3.08 | 93.3 | 1.32 | 33.1 | 36.3 | 0.037   |
| MC38 D12 Veh | 2.24 | 88.8 | 1.73 | 58.6 | 69.1 | 0.016   |
| MC38 D12 Veh | 1.70 | 86.1 | 2.07 | 47.9 | 63.3 | 0.057   |
| MC38 D12 Veh | 2.36 | 82.8 | 3.36 | 48.6 | 62.2 | 0.024   |
| MC38 D12 Veh | 2.46 | 84.4 | 2.96 | 53   | 62.3 | 0.06    |
| MC38 D12 Tx  | 1.84 | 82.1 | 5.05 | 44.5 | 49   | 0.086   |
| MC38 D12 Tx  | 1.65 | 71.8 | 4.67 | 23.6 | 34.6 | 0.15    |
| MC38 D12 Tx  | 2.63 | 70.3 | 3.36 | 40.8 | 32.2 | 0.11    |

**Supplementary Table T9 - CD11c+ Immune Cells**

| Condition   | TBR  | CD11c+CD40+ | CD11c+CD80+ | CD11c+CD86+ |
|-------------|------|-------------|-------------|-------------|
| CT26 D6 Veh | 0.51 | 25.7        | 79.1        | 67          |
| CT26 D6 Veh | 0.52 | 44.1        | 94.5        | 74.7        |
| CT26 D6 Veh | 0.57 | 51          | 91.5        | 79.9        |
| CT26 D6 Veh | 1.33 | 51.7        | 96.6        | 72.4        |
| CT26 D6 Tx  | 0.60 | 47.2        | 92.2        | 80.4        |
| CT26 D6 Tx  | 1.32 | 47.8        | 93.4        | 75.4        |
| CT26 D6 Tx  | 1.85 | 58.9        | 71.7        | 77.2        |
| CT26 D6 Tx  | 2.15 | 48.3        | 91.9        | 80.7        |
| CT26 D9 Veh | 1.34 | 24.4        | 88.6        | 85.8        |
| CT26 D9 Veh | 2.45 | 27          | 86.7        | 83.8        |

|              |      |      |      |      |
|--------------|------|------|------|------|
| CT26 D9 Veh  | 1.48 | 16.1 | 89   | 78   |
| CT26 D9 Veh  | 1.24 | 20.5 | 87   | 77.6 |
| CT26 D9 Tx   | 2.16 | 22.7 | 87.9 | 89.9 |
| CT26 D9 Tx   | 1.07 | 31.4 | 87.1 | 81.8 |
| CT26 D9 Tx   | 2.58 | 29.8 | 86.9 | 69.3 |
| CT26 D9 Tx   | 1.81 | 28.4 | 90.3 | 81   |
| CT26 D12 Veh | 0.94 | 38.6 | 80.6 | 86.4 |
| CT26 D12 Veh | 1.16 | 33.9 | 70.8 | 86.1 |
| CT26 D12 Veh | 2.03 | 38.7 | 77.5 | 92.2 |
| CT26 D12 Veh | 2.37 | 27.3 | 78.6 | 92.7 |
| CT26 D12 Tx  | 2.06 | 80   | 62   | 75   |
| CT26 D12 Tx  | 2.67 | 67.1 | 73.8 | 81.6 |
| CT26 D12 Tx  | 2.94 | 57   | 81   | 82.7 |
| CT26 D12 Tx  | 3.64 | 59.9 | 80.1 | 91.3 |
| MC38 D6 Veh  | 0.77 | 31.6 | 92.7 | 87.5 |
| MC38 D6 Veh  | 0.82 | 24.7 | 75.7 | 82   |
| MC38 D6 Veh  | 0.93 | 13.3 | 93.3 | 86.7 |
| MC38 D6 Veh  | 1.22 | 14   | 92   | 89.9 |
| MC38 D6 Tx   | 0.66 | 48.7 | 93.7 | 96.2 |
| MC38 D6 Tx   | 1.08 | 53.8 | 89.5 | 90.4 |
| MC38 D6 Tx   | 1.54 | 50.9 | 92.3 | 85.8 |
| MC38 D6 Tx   | 1.77 | 44.5 | 94.5 | 92.7 |
| MC38 D9 Veh  | 0.96 | 27.8 | 93.6 | 94.4 |
| MC38 D9 Veh  | 2.09 | 28.7 | 92.3 | 90   |
| MC38 D9 Veh  | 2.23 | 18.6 | 89.6 | 94.1 |
| MC38 D9 Veh  | 2.57 | 12   | 92.4 | 92.9 |
| MC38 D9 Tx   | 2.30 | 21.7 | 95.2 | 93.2 |
| MC38 D9 Tx   | 2.63 | 28   | 90.4 | 96   |
| MC38 D9 Tx   | 3.04 | 35.2 | 93   | 87.4 |
| MC38 D9 Tx   | 3.08 | 32.9 | 96.7 | 93.2 |
| MC38 D12 Veh | 2.24 | 20.6 | 90.1 | 96.4 |
| MC38 D12 Veh | 1.70 | 17.5 | 88.7 | 94.9 |
| MC38 D12 Veh | 2.36 | 16.9 | 87.7 | 93.9 |
| MC38 D12 Veh | 2.46 | 14.2 | 90.6 | 95.5 |
| MC38 D12 Tx  | 1.84 | 19.5 | 81.2 | 96.5 |
| MC38 D12 Tx  | 1.65 | 24.5 | 79.1 | 96.1 |
| MC38 D12 Tx  | 2.63 | 16.5 | 79.1 | 97.6 |

Supplementary Table T10 - CD11c+CD8+ Immune Cells

| Condition   | TBR  | CD11c+CD8+ | CD11c+CD8+<br>CD40+ | CD11c+CD8+<br>CD40+CD80+ | CD11c+CD8+<br>CD40+CD86+ |
|-------------|------|------------|---------------------|--------------------------|--------------------------|
| CT26 D6 Veh | 0.51 | 45.2       | 14.8                | 11.7                     | 9.57                     |
| CT26 D6 Veh | 0.52 | 51.4       | 32                  | 31.5                     | 27.2                     |
| CT26 D6 Veh | 0.57 | 35.1       | 25.5                | 24.7                     | 24.3                     |

|              |      |      |      |      |      |
|--------------|------|------|------|------|------|
| CT26 D6 Veh  | 1.33 | 39.7 | 27.6 | 27.6 | 22.4 |
| CT26 D6 Tx   | 0.60 | 36.8 | 24.5 | 21.1 | 16.5 |
| CT26 D6 Tx   | 1.32 | 34.6 | 26.2 | 23.8 | 14.9 |
| CT26 D6 Tx   | 1.85 | 32.9 | 23.5 | 18.2 | 18.8 |
| CT26 D6 Tx   | 2.15 | 37.7 | 24.2 | 21.5 | 17.9 |
| CT26 D9 Veh  | 1.34 | 37.2 | 11.4 | 10.8 | 10.2 |
| CT26 D9 Veh  | 2.45 | 31   | 9.03 | 8.28 | 7.75 |
| CT26 D9 Veh  | 1.48 | 26.3 | 5.93 | 5.46 | 4.65 |
| CT26 D9 Veh  | 1.24 | 25.9 | 6.59 | 5.77 | 4.88 |
| CT26 D9 Tx   | 2.16 | 35.1 | 10.2 | 9.01 | 9.12 |
| CT26 D9 Tx   | 1.07 | 30.6 | 11.9 | 10.9 | 10.4 |
| CT26 D9 Tx   | 2.58 | 19.8 | 5.95 | 4.87 | 3.79 |
| CT26 D9 Tx   | 1.81 | 25.3 | 10.5 | 9.99 | 8.77 |
| CT26 D12 Veh | 0.94 | 58.8 | 21.9 | 16.5 | 13.3 |
| CT26 D12 Veh | 1.16 | 32.4 | 6.91 | 3.46 | 4.32 |
| CT26 D12 Veh | 2.03 | 44.8 | 13.1 | 10.4 | 11.1 |
| CT26 D12 Veh | 2.37 | 31.9 | 5.45 | 3.8  | 4.38 |
| CT26 D12 Tx  | 2.06 | 34.5 | 23   | 18.4 | 15.9 |
| CT26 D12 Tx  | 2.67 | 49.3 | 26.8 | 21.1 | 19.9 |
| CT26 D12 Tx  | 2.94 | 37.3 | 18.9 | 16.3 | 15.7 |
| CT26 D12 Tx  | 3.64 | 40.1 | 19.7 | 16.2 | 17.4 |
| MC38 D6 Veh  | 0.77 | 21.2 | 7.61 | 7.19 | 7.45 |
| MC38 D6 Veh  | 0.82 | 45.6 | 15.9 | 8.79 | 11.3 |
| MC38 D6 Veh  | 0.93 | 46.7 | 13.3 | 6.67 | 13.3 |
| MC38 D6 Veh  | 1.22 | 11   | 2.01 | 1.66 | 1.84 |
| MC38 D6 Tx   | 0.66 | 14.5 | 6.36 | 6.15 | 6.28 |
| MC38 D6 Tx   | 1.08 | 47   | 23.6 | 21.7 | 22.3 |
| MC38 D6 Tx   | 1.54 | 27.8 | 16.4 | 15.5 | 15.4 |
| MC38 D6 Tx   | 1.77 | 17.1 | 8.2  | 7.78 | 7.39 |
| MC38 D9 Veh  | 0.96 | 40.6 | 13.4 | 13.1 | 13   |
| MC38 D9 Veh  | 2.09 | 17.2 | 5.87 | 5.25 | 5.04 |
| MC38 D9 Veh  | 2.23 | 25.4 | 5.02 | 4.73 | 4.92 |
| MC38 D9 Veh  | 2.57 | 23.1 | 4.59 | 4.39 | 4.33 |
| MC38 D9 Tx   | 2.30 | 28.1 | 9.43 | 9.14 | 8.79 |
| MC38 D9 Tx   | 2.63 | 60.6 | 19.5 | 18.5 | 18.9 |
| MC38 D9 Tx   | 3.04 | 41.5 | 20.3 | 19.6 | 18.9 |
| MC38 D9 Tx   | 3.08 | 53.1 | 23.7 | 23.4 | 22.9 |
| MC38 D12 Veh | 2.24 | 29.1 | 6.88 | 6.5  | 6.72 |
| MC38 D12 Veh | 1.70 | 22.6 | 5.27 | 4.69 | 4.87 |
| MC38 D12 Veh | 2.36 | 32.3 | 6.11 | 5.41 | 5.72 |
| MC38 D12 Veh | 2.46 | 18.7 | 4.01 | 3.74 | 3.86 |
| MC38 D12 Tx  | 1.84 | 73.9 | 14.4 | 13.1 | 13.9 |
| MC38 D12 Tx  | 1.65 | 85.7 | 21.2 | 17.8 | 20.2 |

|             |      |      |      |      |      |
|-------------|------|------|------|------|------|
| MC38 D12 Tx | 2.63 | 86.6 | 14.2 | 12.8 | 13.8 |
|-------------|------|------|------|------|------|

**Supplementary Table T11 - CD11c+CD8- Immune Cells**

| Condition    | TBR  | CD11c+CD8- | CD11c+CD8-<br>CD40+ | CD11c+CD8-<br>CD40+CD80+ | CD11c+CD8-<br>CD40+CD86+ |
|--------------|------|------------|---------------------|--------------------------|--------------------------|
| CT26 D6 Veh  | 0.51 | 54.8       | 10.9                | 8.7                      | 8.26                     |
| CT26 D6 Veh  | 0.52 | 48.6       | 12.2                | 11.9                     | 9.51                     |
| CT26 D6 Veh  | 0.57 | 64.9       | 25.5                | 22.4                     | 21.2                     |
| CT26 D6 Veh  | 1.33 | 60.3       | 24.1                | 24.1                     | 19                       |
| CT26 D6 Tx   | 0.60 | 63.2       | 22.8                | 21.6                     | 19.2                     |
| CT26 D6 Tx   | 1.32 | 65.4       | 21.6                | 20.5                     | 17.3                     |
| CT26 D6 Tx   | 1.85 | 67.1       | 35.4                | 15.9                     | 21.6                     |
| CT26 D6 Tx   | 2.15 | 62.3       | 24.1                | 23.2                     | 21                       |
| CT26 D9 Veh  | 1.34 | 62.8       | 13                  | 12.3                     | 11.5                     |
| CT26 D9 Veh  | 2.45 | 69         | 18                  | 16.9                     | 16.3                     |
| CT26 D9 Veh  | 1.48 | 73.7       | 10.2                | 9.66                     | 8.56                     |
| CT26 D9 Veh  | 1.24 | 74.1       | 13.9                | 12.4                     | 11.7                     |
| CT26 D9 Tx   | 2.16 | 64.9       | 12.5                | 10.9                     | 10.1                     |
| CT26 D9 Tx   | 1.07 | 69.4       | 19.5                | 17                       | 15                       |
| CT26 D9 Tx   | 2.58 | 80.2       | 23.9                | 20.4                     | 13.7                     |
| CT26 D9 Tx   | 1.81 | 74.7       | 17.9                | 16.4                     | 14.1                     |
| CT26 D12 Veh | 0.94 | 41.2       | 16.7                | 4.98                     | 13.5                     |
| CT26 D12 Veh | 1.16 | 67.6       | 26.9                | 7.78                     | 19.7                     |
| CT26 D12 Veh | 2.03 | 55.2       | 25.6                | 11.9                     | 21.2                     |
| CT26 D12 Veh | 2.37 | 68.1       | 21.8                | 9.95                     | 17.3                     |
| CT26 D12 Tx  | 2.06 | 65.5       | 57                  | 25.9                     | 40                       |
| CT26 D12 Tx  | 2.67 | 50.7       | 40.3                | 22.7                     | 29.3                     |
| CT26 D12 Tx  | 2.94 | 62.7       | 38.1                | 26.7                     | 28.6                     |
| CT26 D12 Tx  | 3.64 | 59.9       | 40.2                | 26.7                     | 34.2                     |
| MC38 D6 Veh  | 0.77 | 78.8       | 24                  | 23.4                     | 23                       |
| MC38 D6 Veh  | 0.82 | 54.4       | 8.79                | 8.37                     | 7.53                     |
| MC38 D6 Veh  | 0.93 | 53.3       | 0                   | 0                        | 0                        |
| MC38 D6 Veh  | 1.22 | 89         | 12                  | 11.5                     | 11.5                     |
| MC38 D6 Tx   | 0.66 | 85.5       | 42.4                | 41.4                     | 42.2                     |
| MC38 D6 Tx   | 1.08 | 53         | 30.2                | 28.1                     | 29                       |
| MC38 D6 Tx   | 1.54 | 72.2       | 34.5                | 33.7                     | 32.1                     |
| MC38 D6 Tx   | 1.77 | 82.9       | 36.3                | 35.5                     | 35                       |
| MC38 D9 Veh  | 0.96 | 59.4       | 14.4                | 14                       | 13.7                     |
| MC38 D9 Veh  | 2.09 | 82.8       | 22.8                | 22                       | 21.2                     |
| MC38 D9 Veh  | 2.23 | 74.6       | 13.5                | 13.3                     | 13.1                     |
| MC38 D9 Veh  | 2.57 | 76.9       | 7.44                | 7.2                      | 7.03                     |
| MC38 D9 Tx   | 2.30 | 71.9       | 12.2                | 11.9                     | 11.4                     |
| MC38 D9 Tx   | 2.63 | 39.4       | 8.5                 | 8.29                     | 8.01                     |
| MC38 D9 Tx   | 3.04 | 58.5       | 14.9                | 14.5                     | 13.6                     |

|              |      |      |      |      |      |
|--------------|------|------|------|------|------|
| MC38 D9 Tx   | 3.08 | 46.9 | 9.16 | 8.93 | 8.21 |
| MC38 D12 Veh | 2.24 | 70.9 | 13.7 | 13.4 | 13.5 |
| MC38 D12 Veh | 1.70 | 77.4 | 12.2 | 11.9 | 11.8 |
| MC38 D12 Veh | 2.36 | 67.7 | 10.8 | 10.4 | 10.1 |
| MC38 D12 Veh | 2.46 | 81.3 | 10.2 | 9.97 | 10   |
| MC38 D12 Tx  | 1.84 | 26.1 | 5.12 | 4.93 | 4.87 |
| MC38 D12 Tx  | 1.65 | 14.3 | 3.32 | 3.1  | 2.86 |
| MC38 D12 Tx  | 2.63 | 13.4 | 2.36 | 2.21 | 2.2  |

Supplementary Table T12 – Lymph Node CD8+ Effector T Cells

| Condition       | TBR  | CD8LN | PD1LN | GZBLN | PD1+<br>GZB+LN | PD1-<br>GZB+LN | EOMES+<br>GZB+LN | EOMES-<br>GZB+LN | PD1+EOMES+<br>GZB+LN |
|-----------------|------|-------|-------|-------|----------------|----------------|------------------|------------------|----------------------|
| CT26 D6<br>Veh  | 0.51 | 17.3  | 9.09  | 2.27  | 0              | 2.27           | 2.27             | 0                | 0                    |
| CT26 D6<br>Veh  | 0.52 | 19    | 4.23  | 7.05  | 1.1            | 5.96           | 3.92             | 3.13             | 0.16                 |
| CT26 D6<br>Veh  | 0.57 | 17.4  | 5.24  | 7.19  | 1.16           | 6.03           | 5.44             | 1.75             | 0.65                 |
| CT26 D6<br>Veh  | 1.33 | 19.4  | 12.8  | 55.7  | 7.14           | 48.6           | 8.28             | 47.4             | 1.89                 |
| CT26 D6<br>Tx   | 0.60 | 18.6  | 2.15  | 2.99  | 0.19           | 2.8            | 1.93             | 1.05             | 0.14                 |
| CT26 D6<br>Tx   | 1.32 | 25.9  | 3.89  | 1.94  | 0.15           | 1.79           | 0.75             | 1.2              | 0                    |
| CT26 D6<br>Tx   | 1.85 | 19.9  | 1.88  | 2.42  | 0.27           | 2.15           | 1.35             | 1.08             | 0                    |
| CT26 D6<br>Tx   | 2.15 | 23.4  | 7.18  | 7.18  | 1.66           | 5.52           | 4.42             | 2.76             | 1.1                  |
| CT26 D9<br>Veh  | 1.34 | 14.2  | 3.52  | 6.57  | 0.94           | 5.63           | 3.7              | 2.87             | 0.58                 |
| CT26 D9<br>Veh  | 2.45 | 11.3  | 4.55  | 8.03  | 1.14           | 6.89           | 3.71             | 4.31             | 0.42                 |
| CT26 D9<br>Veh  | 1.48 | 14.2  | 2.76  | 4.97  | 0.55           | 4.42           | 1.66             | 3.31             | 0.55                 |
| CT26 D9<br>Veh  | 1.24 | 18    | 1.47  | 4.11  | 0.16           | 3.96           | 2.09             | 2.02             | 0.12                 |
| CT26 D9<br>Tx   | 2.16 | 12.5  | 10    | 18.6  | 5              | 13.6           | 11.4             | 7.14             | 3.57                 |
| CT26 D9<br>Tx   | 1.07 | 14    | 4.76  | 9.59  | 0.8            | 8.79           | 6.21             | 3.39             | 0.41                 |
| CT26 D9<br>Tx   | 2.58 | 15.9  | 6.22  | 9.8   | 1.73           | 8.07           | 6.99             | 2.81             | 1.37                 |
| CT26 D9<br>Tx   | 1.81 | 12.1  | 7.64  | 21.9  | 4.96           | 16.9           | 14.7             | 7.23             | 2.17                 |
| CT26 D12<br>Veh | 0.94 | 15.5  | 7.47  | 2.71  | 0.41           | 2.29           | 1.74             | 0.97             | 0.29                 |
| CT26 D12<br>Veh | 1.16 | 14.9  | 17.9  | 15.6  | 8.09           | 7.51           | 12.1             | 3.47             | 5.78                 |
| CT26 D12        | 2.03 | 17.5  | 10.7  | 10.5  | 3.96           | 6.5            | 6.87             | 3.59             | 2.6                  |

|              |      |      |      |      |      |      |      |      |      |
|--------------|------|------|------|------|------|------|------|------|------|
| Veh          |      |      |      |      |      |      |      |      |      |
| CT26 D12 Veh | 2.37 | 14.4 | 50.7 | 63.1 | 29.1 | 34   | 53.6 | 9.53 | 24.8 |
| CT26 D12 Tx  | 2.06 | 17.6 | 4.41 | 6.26 | 0.64 | 5.62 | 5.47 | 0.79 | 0.4  |
| CT26 D12 Tx  | 2.67 | 16.3 | 8.16 | 7.47 | 2.01 | 5.45 | 6.09 | 1.38 | 1.53 |
| CT26 D12 Tx  | 2.94 | 17.6 | 8.17 | 8.44 | 1.08 | 7.37 | 6.69 | 1.76 | 0.92 |
| CT26 D12 Tx  | 3.64 | 14.7 | 9.76 | 14.5 | 3.52 | 11   | 10.6 | 3.91 | 2.23 |
| MC38 D6 Veh  | 0.77 | 25   | 4.11 | 2.71 | 0.23 | 2.48 | 1.86 | 0.86 | 0.14 |
| MC38 D6 Veh  | 0.82 | 42.9 | 17.2 | 12.7 | 7.01 | 5.73 | 5.73 | 7.01 | 1.91 |
| MC38 D6 Veh  | 0.93 | 25.7 | 8.02 | 8.52 | 1.75 | 6.77 | 6.02 | 2.51 | 1.25 |
| MC38 D6 Veh  | 1.22 | 23   | 7.28 | 11.7 | 2.13 | 9.57 | 9.42 | 2.28 | 1.55 |
| MC38 D6 Tx   | 0.66 | 25.7 | 8.43 | 5.11 | 1.69 | 3.42 | 4.15 | 0.96 | 1.36 |
| MC38 D6 Tx   | 1.08 | 19.4 | 8.05 | 4.93 | 1.53 | 3.4  | 3.23 | 1.7  | 1.15 |
| MC38 D6 Tx   | 1.54 | 29.6 | 4.69 | 2.55 | 0.54 | 2.01 | 1.46 | 1.09 | 0.29 |
| MC38 D6 Tx   | 1.77 | 22.8 | 7.28 | 3.86 | 1.63 | 2.23 | 3.05 | 0.81 | 1.39 |
| MC38 D9 Veh  | 0.96 | 24.1 | 6.11 | 9.89 | 1.15 | 8.73 | 7.75 | 2.13 | 0.91 |
| MC38 D9 Veh  | 2.09 | 21.7 | 4.99 | 10.4 | 0.76 | 9.6  | 7.39 | 2.97 | 0.51 |
| MC38 D9 Veh  | 2.23 | 19.2 | 4.28 | 8    | 0.62 | 7.38 | 5.9  | 2.09 | 0.48 |
| MC38 D9 Veh  | 2.57 | 14.2 | 41.7 | 79.2 | 33.3 | 45.8 | 29.2 | 50   | 8.33 |
| MC38 D9 Tx   | 2.30 | 18   | 5.54 | 6.65 | 1.94 | 4.71 | 3.88 | 2.77 | 1.11 |
| MC38 D9 Tx   | 2.63 | 17.6 | 18   | 19.4 | 15.1 | 4.34 | 17.3 | 2.14 | 13.4 |
| MC38 D9 Tx   | 3.04 | 25.3 | 2.46 | 4.27 | 0.53 | 3.74 | 3.31 | 0.96 | 0.21 |
| MC38 D9 Tx   | 3.08 | 18.9 | 6.06 | 12.9 | 1.75 | 11.2 | 11.2 | 1.75 | 1.37 |
| MC38 D12 Veh | 2.24 | 19.4 | 7.23 | 13.8 | 4.31 | 9.48 | 12.4 | 1.36 | 3.88 |
| MC38 D12 Veh | 1.70 | 19.3 | 20.2 | 19.2 | 6.6  | 12.6 | 17.1 | 2.11 | 5.83 |
| MC38 D12 Veh | 2.36 | 21.8 | 20.8 | 24.6 | 12.2 | 12.4 | 22.6 | 1.96 | 11.1 |
| MC38 D12 Veh | 2.46 | 19.8 | 5.43 | 14.5 | 2.5  | 12   | 12.2 | 2.34 | 2.13 |

|             |      |      |      |      |      |      |      |      |      |
|-------------|------|------|------|------|------|------|------|------|------|
| MC38 D12 Tx | 1.84 | 19.4 | 76.4 | 85.8 | 65.3 | 20.5 | 79.5 | 6.34 | 59.8 |
| MC38 D12 Tx | 1.65 | 23.2 | 5.6  | 11.6 | 1.78 | 9.86 | 10.4 | 1.19 | 1.57 |
| MC38 D12 Tx | 2.63 | 21.3 | 6.42 | 10.9 | 2.54 | 8.33 | 9.74 | 1.14 | 2.3  |

**Supplementary Table T13 – Lymph Node CD4 T Cells**

| Condition    | TBR  | CD4LN | CD25+FOXP3+LN | CD25FOXP3LN |
|--------------|------|-------|---------------|-------------|
| CT26 D6 Veh  | 0.51 | 48.3  | 4.09          | 77.2        |
| CT26 D6 Veh  | 0.52 | 51.1  | 5.97          | 82.3        |
| CT26 D6 Veh  | 0.57 | 49.2  | 6.33          | 77.2        |
| CT26 D6 Veh  | 1.33 | 50    | 9.24          | 76.1        |
| CT26 D6 Tx   | 0.60 | 47.9  | 4.4           | 82.1        |
| CT26 D6 Tx   | 1.32 | 60.2  | 4.5           | 84.8        |
| CT26 D6 Tx   | 1.85 | 64.6  | 2.28          | 87.1        |
| CT26 D6 Tx   | 2.15 | 57.6  | 11            | 77.4        |
| CT26 D9 Veh  | 1.34 | 20.8  | 8.49          | 34.4        |
| CT26 D9 Veh  | 2.45 | 13.8  | 6.17          | 35.5        |
| CT26 D9 Veh  | 1.48 | 16.6  | 3.36          | 34.5        |
| CT26 D9 Veh  | 1.24 | 17.2  | 3.98          | 40.6        |
| CT26 D9 Tx   | 2.16 | 12.4  | 7.79          | 39.4        |
| CT26 D9 Tx   | 1.07 | 17    | 6.4           | 46.8        |
| CT26 D9 Tx   | 2.58 | 14.1  | 4.25          | 35.4        |
| CT26 D9 Tx   | 1.81 | 15.8  | 6.13          | 36.1        |
| CT26 D12 Veh | 0.94 | 44.7  | 7.87          | 79.8        |
| CT26 D12 Veh | 1.16 | 22    | 23.1          | 38.5        |
| CT26 D12 Veh | 2.03 | 47.1  | 6.2           | 73          |
| CT26 D12 Veh | 2.37 | 31.9  | 13.4          | 17.7        |
| CT26 D12 Tx  | 2.06 | 56.6  | 8.32          | 69.4        |
| CT26 D12 Tx  | 2.67 | 54.8  | 9.06          | 69.6        |
| CT26 D12 Tx  | 2.94 | 52.2  | 10.8          | 62.7        |
| CT26 D12 Tx  | 3.64 | 39.6  | 11.7          | 56.3        |
| MC38 D6 Veh  | 0.77 | 27.2  | 9.83          | 63.3        |
| MC38 D6 Veh  | 0.82 | 38.6  | 8.67          | 58.4        |
| MC38 D6 Veh  | 0.93 | 29.6  | 12.5          | 58.3        |
| MC38 D6 Veh  | 1.22 | 26.3  | 7.4           | 52.9        |
| MC38 D6 Tx   | 0.66 | 29.4  | 9.37          | 76.9        |
| MC38 D6 Tx   | 1.08 | 23.7  | 12.3          | 0.26        |
| MC38 D6 Tx   | 1.54 | 30.7  | 10.1          | 71.8        |
| MC38 D6 Tx   | 1.77 | 29.3  | 8.97          | 71          |
| MC38 D9 Veh  | 0.96 | 24.3  | 10.9          | 61.9        |
| MC38 D9 Veh  | 2.09 | 23.7  | 8.16          | 64.3        |
| MC38 D9 Veh  | 2.23 | 19.5  | 9.23          | 62.7        |

|              |      |      |      |      |
|--------------|------|------|------|------|
| MC38 D9 Veh  | 2.57 | 27   | 4.84 | 32.3 |
| MC38 D9 Tx   | 2.30 | 39   | 4.08 | 76.1 |
| MC38 D9 Tx   | 2.63 | 18.9 | 8.01 | 66.9 |
| MC38 D9 Tx   | 3.04 | 28.8 | 6.01 | 60.9 |
| MC38 D9 Tx   | 3.08 | 23.9 | 7.82 | 52.5 |
| MC38 D12 Veh | 2.24 | 5.94 | 10.7 | 34.1 |
| MC38 D12 Veh | 1.70 | 4.32 | 9.24 | 45.5 |
| MC38 D12 Veh | 2.36 | 6.5  | 11.8 | 34.9 |
| MC38 D12 Veh | 2.46 | 7.89 | 6.08 | 52.6 |
| MC38 D12 Tx  | 1.84 | 18.9 | 12.2 | 30.7 |
| MC38 D12 Tx  | 1.65 | 24.6 | 9.9  | 40.3 |
| MC38 D12 Tx  | 2.63 | 41.2 | 2.95 | 46.4 |

**Supplementary Table T14 – Lymph Node CD8 Checkpoints**

| Condition    | TBR  | CD39LN | CD137LN | CTLA4LN | OX40LN |
|--------------|------|--------|---------|---------|--------|
| CT26 D6 Veh  | 0.51 | 23     | 2.7     | 0       | 8.11   |
| CT26 D6 Veh  | 0.52 | 19.2   | 2.12    | 3.98    | 3.43   |
| CT26 D6 Veh  | 0.57 | 21.4   | 8.99    | 6.17    | 6.03   |
| CT26 D6 Veh  | 1.33 | 25.3   | 8.25    | 5.71    | 6.17   |
| CT26 D6 Tx   | 0.60 | 9.98   | 0.93    | 0.9     | 2      |
| CT26 D6 Tx   | 1.32 | 10.3   | 1.94    | 3.87    | 3.23   |
| CT26 D6 Tx   | 1.85 | 6.39   | 1.24    | 2.06    | 2.47   |
| CT26 D6 Tx   | 2.15 | 16.4   | 5.47    | 7.03    | 8.59   |
| CT26 D9 Veh  | 1.34 | 16.2   | 4.32    | 6.24    | 10.4   |
| CT26 D9 Veh  | 2.45 | 16.1   | 5.14    | 4.94    | 8.94   |
| CT26 D9 Veh  | 1.48 | 11.4   | 5.17    | 8.02    | 10.3   |
| CT26 D9 Veh  | 1.24 | 8.97   | 1.82    | 3.69    | 5.45   |
| CT26 D9 Tx   | 2.16 | 33.9   | 18.2    | 23.3    | 28.8   |
| CT26 D9 Tx   | 1.07 | 13     | 4.37    | 4.8     | 14.9   |
| CT26 D9 Tx   | 2.58 | 8.15   | 3.57    | 5.17    | 5.88   |
| CT26 D9 Tx   | 1.81 | 20.5   | 9.22    | 7.57    | 12.7   |
| CT26 D12 Veh | 0.94 | 28.9   | 13.5    | 28.2    | 28.3   |
| CT26 D12 Veh | 1.16 | 84.2   | 73.9    | 77      | 78     |
| CT26 D12 Veh | 2.03 | 58.2   | 30      | 37.9    | 43.4   |
| CT26 D12 Veh | 2.37 | 93.4   | 47.3    | 45.8    | 65.2   |
| CT26 D12 Tx  | 2.06 | 55.5   | 19.7    | 23.8    | 24.6   |
| CT26 D12 Tx  | 2.67 | 37.3   | 12      | 17.3    | 21.5   |
| CT26 D12 Tx  | 2.94 | 48.7   | 23.3    | 27.6    | 32.3   |
| CT26 D12 Tx  | 3.64 | 70.6   | 27.5    | 28      | 45.2   |
| MC38 D6 Veh  | 0.77 | 11.9   | 1.85    | 2.77    | 5.07   |
| MC38 D6 Veh  | 0.82 | 23.6   | 5.91    | 19.8    | 19.4   |
| MC38 D6 Veh  | 0.93 | 23.7   | 3.99    | 15.5    | 14.6   |
| MC38 D6 Veh  | 1.22 | 29.6   | 3.3     | 11.9    | 10.7   |
| MC38 D6 Tx   | 0.66 | 14.8   | 4.58    | 7       | 6.45   |



|              |      |      |      |      |      |
|--------------|------|------|------|------|------|
| MC38 D6 Tx   | 1.08 | 21.6 | 5.33 | 12.8 | 12   |
| MC38 D6 Tx   | 1.54 | 12.7 | 3.4  | 7.36 | 6.31 |
| MC38 D6 Tx   | 1.77 | 15.5 | 3.76 | 3.92 | 5.11 |
| MC38 D9 Veh  | 0.96 | 15.1 | 14.8 | 21.9 | 19.9 |
| MC38 D9 Veh  | 2.09 | 16   | 15   | 26.1 | 20.1 |
| MC38 D9 Veh  | 2.23 | 14.5 | 26.5 | 20.3 | 18.7 |
| MC38 D9 Veh  | 2.57 | 68.8 | 18.8 | 37.5 | 37.5 |
| MC38 D9 Tx   | 2.30 | 11   | 9.86 | 19.7 | 13.1 |
| MC38 D9 Tx   | 2.63 | 26.3 | 7.7  | 11.8 | 11   |
| MC38 D9 Tx   | 3.04 | 11.8 | 13.4 | 27.2 | 18.5 |
| MC38 D9 Tx   | 3.08 | 27.6 | 13.9 | 25.1 | 25.9 |
| MC38 D12 Veh | 2.24 | 14.1 | 5.2  | 4.72 | 9.08 |
| MC38 D12 Veh | 1.70 | 13.8 | 8.6  | 9.99 | 9.78 |
| MC38 D12 Veh | 2.36 | 21.5 | 9.02 | 6.52 | 12.8 |
| MC38 D12 Veh | 2.46 | 15.4 | 5.16 | 4.32 | 10.2 |
| MC38 D12 Tx  | 1.84 | 93.8 | 50.2 | 23   | 55   |
| MC38 D12 Tx  | 1.65 | 15.2 | 4.89 | 9.43 | 9.7  |
| MC38 D12 Tx  | 2.63 | 15.3 | 9.33 | 44.9 | 13.1 |

**Supplementary Table T15 – Lymph Node CD11b+ Immune Cells**

| <b>Condition</b> | <b>TBR</b> | <b>CD11bLN</b> | <b>Neutrophils<br/>LN</b> | <b>MDSCLN</b> | <b>M1LN</b> | <b>M2LN</b> |
|------------------|------------|----------------|---------------------------|---------------|-------------|-------------|
| CT26 D6 Veh      | 0.51       | 55.9           | 17.6                      | 13.3          | 53.9        | 0.12        |
| CT26 D6 Veh      | 0.52       | 13.5           | 5.13                      | 39.4          | 2.18        | 0.06        |
| CT26 D6 Veh      | 0.57       | 18.5           | 3.86                      | 25.1          | 5.51        | 0.031       |
| CT26 D6 Veh      | 1.33       | 23.7           | 6.57                      | 33            | 8.27        | 0.02        |
| CT26 D6 Tx       | 0.60       | 10.1           | 2.23                      | 7.94          | 4.9         | 0.027       |
| CT26 D6 Tx       | 1.32       | 23.6           | 1.02                      | 16.5          | 9.02        | 0.39        |
| CT26 D6 Tx       | 1.85       | 14.2           | 1.92                      | 18.6          | 6.76        | 0           |
| CT26 D6 Tx       | 2.15       | 21.5           | 2.46                      | 28.2          | 2.67        | 0           |
| CT26 D9 Veh      | 1.34       | 21.8           | 3.18                      | 23.8          | 6.68        | 0           |
| CT26 D9 Veh      | 2.45       | 30.1           | 3.93                      | 32.7          | 7.39        | 0.022       |
| CT26 D9 Veh      | 1.48       | 17.8           | 4.92                      | 32.8          | 7.24        | 0           |
| CT26 D9 Veh      | 1.24       | 12.7           | 5.84                      | 33.8          | 3.06        | 0           |
| CT26 D9 Tx       | 2.16       | 37.3           | 6.18                      | 40.8          | 14.5        | 0           |
| CT26 D9 Tx       | 1.07       | 29.1           | 12.9                      | 78.6          | 0.92        | 0.29        |
| CT26 D9 Tx       | 2.58       | 27.8           | 8.92                      | 63.5          | 1.14        | 0.42        |
| CT26 D9 Tx       | 1.81       | 51.9           | 5.1                       | 50.2          | 10.4        | 0.037       |
| CT26 D12 Veh     | 0.94       | 15.5           | 2.58                      | 20.9          | 1.41        | 0.04        |
| CT26 D12 Veh     | 1.16       | 49.2           | 1.55                      | 32.5          | 15.2        | 0           |
| CT26 D12 Veh     | 2.03       | 58.1           | 1.11                      | 22.4          | 17.8        | 0.061       |
| CT26 D12 Veh     | 2.37       | 83.8           | 2.21                      | 33.4          | 29.7        | 0           |
| CT26 D12 Tx      | 2.06       | 20.5           | 3.29                      | 19.4          | 7.79        | 0           |
| CT26 D12 Tx      | 2.67       | 15.6           | 2.52                      | 18.6          | 4.72        | 0.15        |

|              |      |      |      |      |      |       |
|--------------|------|------|------|------|------|-------|
| CT26 D12 Tx  | 2.94 | 29.3 | 2.78 | 22.9 | 9.04 | 0.15  |
| CT26 D12 Tx  | 3.64 | 54.6 | 1.35 | 19.8 | 28.1 | 0.11  |
| MC38 D6 Veh  | 0.77 | 15.2 | 8.59 | 21.4 | 11.3 | 0.024 |
| MC38 D6 Veh  | 0.82 | 35.1 | 3.82 | 40.6 | 8.7  | 0.72  |
| MC38 D6 Veh  | 0.93 | 20.9 | 3.79 | 30   | 3.38 | 1.21  |
| MC38 D6 Veh  | 1.22 | 19.8 | 4.51 | 29.2 | 13.2 | 0.3   |
| MC38 D6 Tx   | 0.66 | 11   | 3.56 | 22.5 | 4.62 | 0.062 |
| MC38 D6 Tx   | 1.08 | 12.5 | 5.68 | 34.6 | 5.49 | 0.25  |
| MC38 D6 Tx   | 1.54 | 14.2 | 3.75 | 27   | 9.92 | 0.086 |
| MC38 D6 Tx   | 1.77 | 14.6 | 7.62 | 23.1 | 9.09 | 0.11  |
| MC38 D9 Veh  | 0.96 | 14   | 3.86 | 18.3 | 6.9  | 1.39  |
| MC38 D9 Veh  | 2.09 | 15.9 | 5.46 | 20.8 | 10.9 | 0.2   |
| MC38 D9 Veh  | 2.23 | 18.2 | 5.32 | 24.4 | 7.81 | 0.26  |
| MC38 D9 Veh  | 2.57 | 55.1 | 6.37 | 32.9 | 43.4 | 0     |
| MC38 D9 Tx   | 2.30 | 19.3 | 4.52 | 25.3 | 33.5 | 0.19  |
| MC38 D9 Tx   | 2.63 | 29.3 | 4.18 | 14.9 | 22.4 | 0.25  |
| MC38 D9 Tx   | 3.04 | 15.3 | 3.84 | 23.2 | 13.5 | 0.81  |
| MC38 D9 Tx   | 3.08 | 11.7 | 4.76 | 22.7 | 4.58 | 0.57  |
| MC38 D12 Veh | 2.24 | 37.4 | 10.6 | 29   | 23.4 | 0.25  |
| MC38 D12 Veh | 1.70 | 24.6 | 7.3  | 22.3 | 16.1 | 0.22  |
| MC38 D12 Veh | 2.36 | 42.5 | 4.33 | 25.3 | 31   | 0.46  |
| MC38 D12 Veh | 2.46 | 35.4 | 4.59 | 27.5 | 29.4 | 0.21  |
| MC38 D12 Tx  | 1.84 | 76.4 | 2.81 | 43.6 | 36.9 | 0.28  |
| MC38 D12 Tx  | 1.65 | 18.4 | 12.5 | 27.7 | 7.37 | 0.57  |
| MC38 D12 Tx  | 2.63 | 21.7 | 13.2 | 29.5 | 11.7 | 0.48  |

Supplementary Table T16 – Lymph Node CD11c+ Immune Cells

| Condition   | TBR  | CD11c LN | CD40 LN | CD11c+ CD40+LN | CD11c+ CD80+LN | CD11c+ CD86+LN |
|-------------|------|----------|---------|----------------|----------------|----------------|
| CT26 D6 Veh | 0.51 | 5.69     | 51.8    | 47.1           | 47.1           | 100            |
| CT26 D6 Veh | 0.52 | 3.47     | 29.8    | 37.5           | 55.9           | 72.4           |
| CT26 D6 Veh | 0.57 | 3.9      | 44.4    | 39.3           | 70.4           | 66.4           |
| CT26 D6 Veh | 1.33 | 4.35     | 39.9    | 40.9           | 67.1           | 73.2           |
| CT26 D6 Tx  | 0.60 | 2.92     | 40.3    | 39.6           | 54.2           | 72.2           |
| CT26 D6 Tx  | 1.32 | 3.14     | 14.7    | 38.1           | 66.7           | 85.7           |
| CT26 D6 Tx  | 1.85 | 2.37     | 16.2    | 39             | 46.3           | 80.5           |
| CT26 D6 Tx  | 2.15 | 6.03     | 23.1    | 55.3           | 38.3           | 74.5           |
| CT26 D9 Veh | 1.34 | 8.56     | 35      | 25.3           | 59.4           | 77             |
| CT26 D9 Veh | 2.45 | 7.24     | 36.2    | 18.8           | 65.6           | 70.7           |
| CT26 D9 Veh | 1.48 | 3.12     | 38.7    | 32.3           | 58.1           | 77.4           |
| CT26 D9 Veh | 1.24 | 3.53     | 29.7    | 25.2           | 35.3           | 75             |
| CT26 D9 Tx  | 2.16 | 8.81     | 35      | 54.1           | 64.3           | 53.1           |
| CT26 D9 Tx  | 1.07 | 3.13     | 27.7    | 41.7           | 42.5           | 64             |
| CT26 D9 Tx  | 2.58 | 2.37     | 27.6    | 34.2           | 41.3           | 73.4           |

|              |      |      |      |      |      |      |
|--------------|------|------|------|------|------|------|
| CT26 D9 Tx   | 1.81 | 5.51 | 25.7 | 32.4 | 75.1 | 79.3 |
| CT26 D12 Veh | 0.94 | 23.5 | 39.6 | 90   | 8.56 | 63.6 |
| CT26 D12 Veh | 1.16 | 34.8 | 36   | 90.8 | 21.7 | 80.6 |
| CT26 D12 Veh | 2.03 | 28.6 | 32.5 | 88.3 | 26.6 | 80   |
| CT26 D12 Veh | 2.37 | 41.7 | 34.4 | 64.5 | 66   | 87.3 |
| CT26 D12 Tx  | 2.06 | 19.8 | 27.6 | 89.5 | 11.4 | 63.6 |
| CT26 D12 Tx  | 2.67 | 18   | 24.7 | 88.9 | 15.8 | 63.7 |
| CT26 D12 Tx  | 2.94 | 27.4 | 31.8 | 89.8 | 11.2 | 73.9 |
| CT26 D12 Tx  | 3.64 | 31.7 | 43.3 | 84.9 | 39.5 | 72.6 |
| MC38 D6 Veh  | 0.77 | 4.51 | 31.2 | 20   | 60.2 | 82.6 |
| MC38 D6 Veh  | 0.82 | 10.2 | 28.5 | 14.3 | 78.6 | 57.1 |
| MC38 D6 Veh  | 0.93 | 6    | 33.1 | 20.7 | 73   | 80.2 |
| MC38 D6 Veh  | 1.22 | 7.64 | 42.1 | 19.2 | 78.8 | 85.3 |
| MC38 D6 Tx   | 0.66 | 6.16 | 37.2 | 25.3 | 63.2 | 86.1 |
| MC38 D6 Tx   | 1.08 | 5.87 | 50.6 | 27   | 61.3 | 79.3 |
| MC38 D6 Tx   | 1.54 | 7.07 | 39.6 | 34.1 | 64.2 | 85.3 |
| MC38 D6 Tx   | 1.77 | 5.31 | 43.2 | 27.5 | 67.8 | 81.6 |
| MC38 D9 Veh  | 0.96 | 8.25 | 39.4 | 35.8 | 55.6 | 77.1 |
| MC38 D9 Veh  | 2.09 | 8.58 | 40.3 | 34.2 | 50.7 | 70.8 |
| MC38 D9 Veh  | 2.23 | 6.97 | 52.3 | 36.6 | 54.5 | 70.6 |
| MC38 D9 Veh  | 2.57 | 12.2 | 25.9 | 33.3 | 91.7 | 79.2 |
| MC38 D9 Tx   | 2.30 | 5.42 | 21.6 | 19.8 | 64.2 | 84   |
| MC38 D9 Tx   | 2.63 | 9.39 | 28.8 | 37.3 | 80.2 | 88.4 |
| MC38 D9 Tx   | 3.04 | 10.7 | 38.3 | 46.3 | 35.5 | 64.9 |
| MC38 D9 Tx   | 3.08 | 6.93 | 45.4 | 34.6 | 43.5 | 80.8 |
| MC38 D12 Veh | 2.24 | 8.66 | 31.1 | 25.2 | 63.7 | 83.1 |
| MC38 D12 Veh | 1.70 | 8.11 | 35.3 | 41.7 | 54.6 | 80   |
| MC38 D12 Veh | 2.36 | 13.4 | 26.8 | 26.9 | 73.9 | 89.8 |
| MC38 D12 Veh | 2.46 | 12.6 | 28.6 | 22.6 | 70.7 | 83.4 |
| MC38 D12 Tx  | 1.84 | 24.1 | 56.9 | 47.1 | 84.6 | 77.4 |
| MC38 D12 Tx  | 1.65 | 8.1  | 23.2 | 24.5 | 39.5 | 73.8 |
| MC38 D12 Tx  | 2.63 | 7.08 | 34.4 | 25.8 | 45.5 | 77.7 |

Supplementary Table T17 – Lymph Node CD11c+ CD8+

| Condition   | TBR  | CD11c+CD8+LN | CD11c+CD8+CD40+LN | CD11c+CD8+CD40+CD80+LN | CD11c+CD8+CD40+CD86+LN |
|-------------|------|--------------|-------------------|------------------------|------------------------|
| CT26 D6 Veh | 0.51 | 64.7         | 41.2              | 11.8                   | 41.2                   |
| CT26 D6 Veh | 0.52 | 58           | 18.6              | 11.8                   | 15                     |
| CT26 D6 Veh | 0.57 | 67.8         | 29                | 18.3                   | 20.3                   |
| CT26 D6 Veh | 1.33 | 63.2         | 27.1              | 16.5                   | 20.4                   |
| CT26 D6 Tx  | 0.60 | 58.2         | 25.1              | 10.4                   | 16.1                   |
| CT26 D6 Tx  | 1.32 | 69           | 31                | 23.8                   | 31                     |
| CT26 D6 Tx  | 1.85 | 55.3         | 17.9              | 4.07                   | 13.8                   |
| CT26 D6 Tx  | 2.15 | 63.8         | 25.5              | 14.9                   | 19.1                   |

|              |      |      |      |      |      |
|--------------|------|------|------|------|------|
| CT26 D9 Veh  | 1.34 | 55.4 | 11.7 | 8.15 | 10.4 |
| CT26 D9 Veh  | 2.45 | 39.2 | 7.63 | 5.6  | 6.36 |
| CT26 D9 Veh  | 1.48 | 34.4 | 14   | 6.45 | 6.45 |
| CT26 D9 Veh  | 1.24 | 61   | 14   | 5.59 | 11   |
| CT26 D9 Tx   | 2.16 | 55.1 | 34.7 | 20.4 | 21.4 |
| CT26 D9 Tx   | 1.07 | 72.7 | 31.3 | 8.72 | 19.4 |
| CT26 D9 Tx   | 2.58 | 60.7 | 18.9 | 8.08 | 14.1 |
| CT26 D9 Tx   | 1.81 | 43.4 | 18.7 | 13.3 | 14.4 |
| CT26 D12 Veh | 0.94 | 25.8 | 17.7 | 2.25 | 9.4  |
| CT26 D12 Veh | 1.16 | 61.8 | 53.8 | 13.6 | 41.9 |
| CT26 D12 Veh | 2.03 | 45.3 | 37.9 | 9.25 | 30.4 |
| CT26 D12 Veh | 2.37 | 40.9 | 26.7 | 14.1 | 20.8 |
| CT26 D12 Tx  | 2.06 | 40.9 | 31.2 | 3.95 | 15.3 |
| CT26 D12 Tx  | 2.67 | 32.1 | 23.1 | 4.75 | 13   |
| CT26 D12 Tx  | 2.94 | 31.2 | 22.4 | 4    | 14.3 |
| CT26 D12 Tx  | 3.64 | 29.3 | 22.6 | 8.34 | 15   |
| MC38 D6 Veh  | 0.77 | 76.9 | 16.7 | 9.48 | 13.6 |
| MC38 D6 Veh  | 0.82 | 85.7 | 0    | 0    | 0    |
| MC38 D6 Veh  | 0.93 | 79.3 | 12.6 | 6.31 | 9.91 |
| MC38 D6 Veh  | 1.22 | 80.8 | 12.8 | 7.05 | 12.2 |
| MC38 D6 Tx   | 0.66 | 87.1 | 19.5 | 12.2 | 16.1 |
| MC38 D6 Tx   | 1.08 | 86.2 | 19.7 | 11.4 | 16   |
| MC38 D6 Tx   | 1.54 | 88.7 | 27.3 | 19.2 | 23.8 |
| MC38 D6 Tx   | 1.77 | 77.5 | 20.4 | 13.8 | 16.4 |
| MC38 D9 Veh  | 0.96 | 84.1 | 25.5 | 13.4 | 18.3 |
| MC38 D9 Veh  | 2.09 | 81.5 | 20.9 | 7.09 | 11.9 |
| MC38 D9 Veh  | 2.23 | 77.1 | 22.5 | 9.88 | 16.4 |
| MC38 D9 Veh  | 2.57 | 83.3 | 25   | 20.8 | 20.8 |
| MC38 D9 Tx   | 2.30 | 60.4 | 10.4 | 2.83 | 7.55 |
| MC38 D9 Tx   | 2.63 | 57.3 | 23.9 | 19.2 | 21.2 |
| MC38 D9 Tx   | 3.04 | 74.1 | 24.3 | 5.75 | 14.1 |
| MC38 D9 Tx   | 3.08 | 87.2 | 27.5 | 8.93 | 19.9 |
| MC38 D12 Veh | 2.24 | 58.8 | 15.4 | 9.65 | 12.9 |
| MC38 D12 Veh | 1.70 | 68.5 | 27.3 | 14.2 | 20.7 |
| MC38 D12 Veh | 2.36 | 57.1 | 16.8 | 11.8 | 14.4 |
| MC38 D12 Veh | 2.46 | 58.5 | 14.6 | 11   | 13.1 |
| MC38 D12 Tx  | 1.84 | 77.1 | 40.9 | 35.4 | 26.4 |
| MC38 D12 Tx  | 1.65 | 64.7 | 17.8 | 6.18 | 11   |
| MC38 D12 Tx  | 2.63 | 77.8 | 21.8 | 12.9 | 14.4 |

Supplementary Table T18 – Lymph Node CD11c-CD8+ Immune Cells

| Condition   | TBR  | CD11c+CD8-LN | CD11c+CD8-CD40+LN | CD11c+CD8-CD40+CD80+ | CD11c+CD8-CD40+CD86+LN |
|-------------|------|--------------|-------------------|----------------------|------------------------|
| CT26 D6 Veh | 0.51 | 35.3         | 5.88              | 5.88                 | 5.88                   |

|              |      |      |      |      |      |
|--------------|------|------|------|------|------|
| CT26 D6 Veh  | 0.52 | 42   | 18.9 | 1.31 | 5.51 |
| CT26 D6 Veh  | 0.57 | 32.2 | 10.3 | 4.25 | 6.52 |
| CT26 D6 Veh  | 1.33 | 36.8 | 13.8 | 2.35 | 9.25 |
| CT26 D6 Tx   | 0.60 | 41.8 | 14.6 | 2.32 | 6.69 |
| CT26 D6 Tx   | 1.32 | 31   | 7.14 | 0    | 0    |
| CT26 D6 Tx   | 1.85 | 44.7 | 21.1 | 2.44 | 11.4 |
| CT26 D6 Tx   | 2.15 | 36.2 | 29.8 | 0    | 17   |
| CT26 D9 Veh  | 1.34 | 44.6 | 13.6 | 3.93 | 9.78 |
| CT26 D9 Veh  | 2.45 | 60.8 | 11.2 | 4.07 | 9.41 |
| CT26 D9 Veh  | 1.48 | 65.6 | 18.3 | 5.38 | 14   |
| CT26 D9 Veh  | 1.24 | 39   | 11.2 | 0.87 | 8.57 |
| CT26 D9 Tx   | 2.16 | 44.9 | 19.4 | 3.06 | 3.06 |
| CT26 D9 Tx   | 1.07 | 27.3 | 10.4 | 1.83 | 6.19 |
| CT26 D9 Tx   | 2.58 | 39.3 | 15.2 | 1.39 | 8.78 |
| CT26 D9 Tx   | 1.81 | 56.6 | 13.7 | 7.64 | 9.66 |
| CT26 D12 Veh | 0.94 | 74.2 | 72.3 | 0.75 | 47.3 |
| CT26 D12 Veh | 1.16 | 38.2 | 37   | 1.16 | 30.3 |
| CT26 D12 Veh | 2.03 | 54.7 | 50.4 | 8.63 | 39.2 |
| CT26 D12 Veh | 2.37 | 59.1 | 37.8 | 21.9 | 32.1 |
| CT26 D12 Tx  | 2.06 | 59.1 | 58.3 | 0.66 | 37.9 |
| CT26 D12 Tx  | 2.67 | 67.9 | 65.8 | 2.29 | 40.1 |
| CT26 D12 Tx  | 2.94 | 68.8 | 67.4 | 0.84 | 49.8 |
| CT26 D12 Tx  | 3.64 | 70.7 | 62.3 | 20.3 | 45.1 |
| MC38 D6 Veh  | 0.77 | 23.1 | 3.36 | 1.68 | 2.6  |
| MC38 D6 Veh  | 0.82 | 14.3 | 14.3 | 0    | 7.14 |
| MC38 D6 Veh  | 0.93 | 20.7 | 8.11 | 2.7  | 5.41 |
| MC38 D6 Veh  | 1.22 | 19.2 | 6.41 | 1.28 | 2.56 |
| MC38 D6 Tx   | 0.66 | 12.9 | 5.77 | 2.38 | 4.24 |
| MC38 D6 Tx   | 1.08 | 13.8 | 7.34 | 1.94 | 3.89 |
| MC38 D6 Tx   | 1.54 | 11.3 | 6.87 | 2.83 | 4.44 |
| MC38 D6 Tx   | 1.77 | 22.5 | 7.09 | 4.29 | 5.42 |
| MC38 D9 Veh  | 0.96 | 15.9 | 10.3 | 0.98 | 2.04 |
| MC38 D9 Veh  | 2.09 | 18.5 | 13.3 | 0.87 | 2.11 |
| MC38 D9 Veh  | 2.23 | 22.9 | 14   | 1.98 | 2.17 |
| MC38 D9 Veh  | 2.57 | 16.7 | 8.33 | 4.17 | 0    |
| MC38 D9 Tx   | 2.30 | 39.6 | 9.43 | 3.77 | 3.77 |
| MC38 D9 Tx   | 2.63 | 42.7 | 13.5 | 11.3 | 11.2 |
| MC38 D9 Tx   | 3.04 | 25.9 | 22   | 0.32 | 2.24 |
| MC38 D9 Tx   | 3.08 | 12.8 | 7.11 | 0.76 | 1.76 |
| MC38 D12 Veh | 2.24 | 41.2 | 9.77 | 2.88 | 4.01 |
| MC38 D12 Veh | 1.70 | 31.5 | 14.5 | 3.9  | 6.25 |
| MC38 D12 Veh | 2.36 | 42.9 | 10.1 | 7.5  | 7.96 |
| MC38 D12 Veh | 2.46 | 41.5 | 8    | 5.91 | 6.09 |

|             |      |      |      |      |      |
|-------------|------|------|------|------|------|
| MC38 D12 Tx | 1.84 | 22.9 | 6.17 | 5.29 | 3.2  |
| MC38 D12 Tx | 1.65 | 35.3 | 6.68 | 0.94 | 3.65 |
| MC38 D12 Tx | 2.63 | 22.2 | 3.98 | 1.14 | 2.46 |
